# Supplementary material
Source: PubMed Central journal article supplement (PMC6070082)
Supplement: kwy017_albanes_web_material_final.pdf [file kwy017_albanes_web_material_final.pdf]

## Web Material Legend

**Web Figure 1.** Participant Flow Chart for Associations Between the Serum Metabolomic Profiling and All-Cause Mortality: A Prospective Analysis in the Alpha-Tocopherol, Beta-Carotene Cancer Prevention (ATBC) Study (1985-2013).

**Web Table 1.** List of Measured Known Metabolites in the ATBC Study (1985-2013).

**Web Table 2.** Pathway Analysis for Chemical Class of Metabolites for All-Cause Mortality in the ATBC Study (1985-2013).

**Web Table 3.** Pathway Analysis for Chemical Sub-Class of Metabolites for All-Cause Mortality in the ATBC Study (1985-2013).

**Web Table 4.** Pathway Analysis for Chemical Class of Metabolites for CVD Mortality in the ATBC Study (1985-2013).

**Web Table 5.** Pathway Analysis for Chemical Sub-Class of Metabolites for CVD Mortality in the ATBC Study (1985-2013).

**Web Table 6.** Pathway Analysis for Chemical Class of Metabolites for Cancer Mortality in the ATBC Study (1985-2013).

**Web Table 7.** Pathway Analysis for Chemical Sub-Class of Metabolites for Cancer Mortality in the ATBC Study (1985-2013).

**Web Figure 2.** A Heatmap Representing Correlation Coefficients of Log(Metabolites) for All-Cause Mortality in the ATBC study (1985-2013). Coefficients are represented by percent.

**Web Figure 3.** A Heatmap Representing Correlation Coefficients of Log(Metabolites) for Cardiovascular Disease (CVD) Related Mortality in the ATBC study (1985-2013). Coefficients are represented by percent.

**Web Figure 4.** A Heatmap Representing Correlation Coefficients of Log(Metabolites) for Cancer Mortality in the ATBC study (1985-2013). Coefficients are represented by percent.

**Web Figure 5.** A Heatmap Representing Correlation Coefficients Between All-Cause Mortality and Log(Metabolites) that Constituted of Metabolite Risk Score in the ATBC study (1985-2013).

**Web Figure 6.** A Heatmap Representing Correlation Coefficients Between Cardiovascular Disease (CVD) Related Mortality and Log(Metabolites) that Constituted of Metabolite Risk Score in the ATBC study (1985-2013).

**Web Figure 1.** Participant Flow Chart for Associations Between the Serum Metabolomic Profiling and All-Cause Mortality: A Prospective Analysis in the Alpha-Tocopherol, Beta-Carotene Cancer Prevention (ATBC) Study (1985-2013).<sup>a</sup>



<sup>a</sup> Sample sizes may differ from the original study sets because of some duplicate participants across the studies. The two sets of prostate cancer study controls are different individuals. The present analysis is based on non-cancer, control participants previously selected for one of five metabolomic studies nested within the ATBC Study (control participants: they are cancer-free individuals at the index date, but they were able to develop cancer during the follow-up period).

**Web Table 1.** List of Measured Known Metabolites in the ATBC Study (1985-2013).

| <b>Metabolite</b>             | <b>Reported in the present study</b> | <b>Super pathway</b> | <b>Sub pathway</b>                                                  |
|-------------------------------|--------------------------------------|----------------------|---------------------------------------------------------------------|
| Alanine                       | Yes                                  | Amino acid           | Alanine and aspartate metabolism                                    |
| Asparagine                    | Yes                                  | Amino acid           | Alanine and aspartate metabolism                                    |
| Aspartate                     | Yes                                  | Amino acid           | Alanine and aspartate metabolism                                    |
| N_acetylaniline               | Yes                                  | Amino acid           | Alanine and aspartate metabolism                                    |
| _2_aminobutyrate              | Yes                                  | Amino acid           | Butanoate metabolism; cysteine, methionine, sam, taurine metabolism |
| Creatine                      | Yes                                  | Amino acid           | Creatine metabolism                                                 |
| Creatinine                    | Yes                                  | Amino acid           | Creatine metabolism                                                 |
| _2_hydroxybutyrate__ahb_      | Yes                                  | Amino acid           | Cysteine, methionine, SAM, taurine metabolism                       |
| Cysteine                      | Yes                                  | Amino acid           | Cysteine, methionine, SAM, taurine metabolism                       |
| Cystine                       | Yes                                  | Amino acid           | Cysteine, methionine, SAM, taurine metabolism                       |
| Methionine                    | Yes                                  | Amino acid           | Cysteine, methionine, SAM, taurine metabolism                       |
| N_acetylmethionine            | Yes                                  | Amino acid           | Cysteine, methionine, SAM, taurine metabolism                       |
| N_formylmethionine            | Yes                                  | Amino acid           | Cysteine, methionine, SAM, taurine metabolism                       |
| S_methylcysteine              | Yes                                  | Amino acid           | Cysteine, methionine, SAM, taurine metabolism                       |
| Taurine                       | Yes                                  | Amino acid           | Cysteine, methionine, SAM, taurine metabolism                       |
| Glutamate                     | Yes                                  | Amino acid           | Glutamate metabolism                                                |
| Glutamine                     | Yes                                  | Amino acid           | Glutamate metabolism                                                |
| Pyroglutamine                 | Yes                                  | Amino acid           | Glutamate metabolism                                                |
| _5_oxoproline                 | Yes                                  | Amino acid           | Glutathione metabolism                                              |
| Cysteine_glutathione_disulfid | Yes                                  | Amino acid           | Glutathione metabolism                                              |
| Betaine                       | Yes                                  | Amino acid           | Glycine, serine and threonine metabolism                            |
| Dimethylglycine               | Yes                                  | Amino acid           | Glycine, serine and threonine metabolism                            |
| Glycine                       | Yes                                  | Amino acid           | Glycine, serine and threonine metabolism                            |
| N_acetylglycine               | Yes                                  | Amino acid           | Glycine, serine and threonine metabolism                            |
| N_acetylserine                | Yes                                  | Amino acid           | Glycine, serine and threonine metabolism                            |
| N_acetylthreonine             | Yes                                  | Amino acid           | Glycine, serine and threonine metabolism                            |
| Serine                        | Yes                                  | Amino acid           | Glycine, serine and threonine metabolism                            |
| Threonine                     | Yes                                  | Amino acid           | Glycine, serine and threonine                                       |

|                              |     |            |                                                             |
|------------------------------|-----|------------|-------------------------------------------------------------|
|                              |     |            | metabolism                                                  |
| _4_guanidinobutanoate        | Yes | Amino acid | Guanidino and acetamido metabolism                          |
| _4_acetamidobutanoate        | Yes | Amino acid | Guanidino and acetamido metabolism;<br>polyamine metabolism |
| _1_methylhistidine           | Yes | Amino acid | Histidine metabolism                                        |
| _1_methylimidazoleacetate    | Yes | Amino acid | Histidine metabolism                                        |
| _3_methylhistidine           | Yes | Amino acid | Histidine metabolism                                        |
| Histidine                    | Yes | Amino acid | Histidine metabolism                                        |
| Imidazole_propionate         | Yes | Amino acid | Histidine metabolism                                        |
| Trans_urocanate              | Yes | Amino acid | Histidine metabolism                                        |
| _2_aminoadipate              | Yes | Amino acid | Lysine metabolism                                           |
| Glutaryl carnitine           | Yes | Amino acid | Lysine metabolism                                           |
| Lysine                       | Yes | Amino acid | Lysine metabolism                                           |
| N6_acetyllysine              | Yes | Amino acid | Lysine metabolism                                           |
| Pipecolate                   | Yes | Amino acid | Lysine metabolism                                           |
| _3_3_hydroxyphenyl_propionat | Yes | Amino acid | Phenylalanine & tyrosine metabolism                         |
| _3_4_hydroxyphenyl_lactate   | Yes | Amino acid | Phenylalanine & tyrosine metabolism                         |
| _3_methoxytyrosine           | Yes | Amino acid | Phenylalanine & tyrosine metabolism                         |
| _3_phenylpropionate          | Yes | Amino acid | Phenylalanine & tyrosine metabolism                         |
| _4_hydroxyphenylpyruvate     | Yes | Amino acid | Phenylalanine & tyrosine metabolism                         |
| Gentisate                    | Yes | Amino acid | Phenylalanine & tyrosine metabolism                         |
| N_acetylphenylalanine        | Yes | Amino acid | Phenylalanine & tyrosine metabolism                         |
| N_acetyltyrosine             | Yes | Amino acid | Phenylalanine & tyrosine metabolism                         |
| O_cresol_sulfate             | Yes | Amino acid | Phenylalanine & tyrosine metabolism                         |
| P_cresol_sulfate             | Yes | Amino acid | Phenylalanine & tyrosine metabolism                         |
| Phenol_sulfate               | Yes | Amino acid | Phenylalanine & tyrosine metabolism                         |
| Phenylacetate                | Yes | Amino acid | Phenylalanine & tyrosine metabolism                         |
| Phenylacetylglutamine        | Yes | Amino acid | Phenylalanine & tyrosine metabolism                         |
| Phenylalanine                | Yes | Amino acid | Phenylalanine & tyrosine metabolism                         |
| Phenyllactate__pla_          | Yes | Amino acid | Phenylalanine & tyrosine metabolism                         |
| Tyrosine                     | Yes | Amino acid | Phenylalanine & tyrosine metabolism                         |
| _5_methylthioadenosine__mta_ | Yes | Amino acid | Polyamine metabolism                                        |
| Acisoga                      | Yes | Amino acid | Polyamine metabolism                                        |
| N_acetylputrescine           | Yes | Amino acid | Polyamine metabolism                                        |
| _3_indoxyl_sulfate           | Yes | Amino acid | Tryptophan metabolism                                       |
| C_glycosyltryptophan         | Yes | Amino acid | Tryptophan metabolism                                       |
| Indoleacetate                | Yes | Amino acid | Tryptophan metabolism                                       |
| Indoleacetylglutamine        | Yes | Amino acid | Tryptophan metabolism                                       |
| Indolelactate                | Yes | Amino acid | Tryptophan metabolism                                       |
| Indolepropionate             | Yes | Amino acid | Tryptophan metabolism                                       |
| Kynurenate                   | Yes | Amino acid | Tryptophan metabolism                                       |
| Kynurenine                   | Yes | Amino acid | Tryptophan metabolism                                       |
| N_acetyltryptophan           | Yes | Amino acid | Tryptophan metabolism                                       |

|                              |     |            |                                             |
|------------------------------|-----|------------|---------------------------------------------|
| Tryptophan                   | Yes | Amino acid | Tryptophan metabolism                       |
| Tryptophan_betaine           | Yes | Amino acid | Tryptophan metabolism                       |
| Arginine                     | Yes | Amino acid | Urea cycle; arginine and proline metabolism |
| Citrulline                   | Yes | Amino acid | Urea cycle; arginine and proline metabolism |
| Dimethylarginine__sdma__adma | Yes | Amino acid | Urea cycle; arginine and proline metabolism |
| Homocitrulline               | Yes | Amino acid | Urea cycle; arginine and proline metabolism |
| N_delta_acetylornithine      | Yes | Amino acid | Urea cycle; arginine and proline metabolism |
| N_methyl_proline             | Yes | Amino acid | Urea cycle; arginine and proline metabolism |
| Ornithine                    | Yes | Amino acid | Urea cycle; arginine and proline metabolism |
| Trans_4_hydroxyproline       | Yes | Amino acid | Urea cycle; arginine and proline metabolism |
| Urea                         | Yes | Amino acid | Urea cycle; arginine and proline metabolism |
| _2_hydroxy_3_methylvalerate  | Yes | Amino acid | Valine, leucine and isoleucine metabolism   |
| _3_hydroxy_2_ethylpropionate | Yes | Amino acid | Valine, leucine and isoleucine metabolism   |
| _3_hydroxyisobutyrate        | Yes | Amino acid | Valine, leucine and isoleucine metabolism   |
| _3_methyl_2_oxobutyrate      | Yes | Amino acid | Valine, leucine and isoleucine metabolism   |
| _3_methyl_2_oxovalerate      | Yes | Amino acid | Valine, leucine and isoleucine metabolism   |
| _4_methyl_2_oxopentanoate    | Yes | Amino acid | Valine, leucine and isoleucine metabolism   |
| Alpha_hydroxyisocaproate     | Yes | Amino acid | Valine, leucine and isoleucine metabolism   |
| Alpha_hydroxyisovalerate     | Yes | Amino acid | Valine, leucine and isoleucine metabolism   |
| Beta_hydroxyisovalerate      | Yes | Amino acid | Valine, leucine and isoleucine metabolism   |
| Isobutyrylcarnitine          | Yes | Amino acid | Valine, leucine and isoleucine metabolism   |
| Isoleucine                   | Yes | Amino acid | Valine, leucine and isoleucine metabolism   |
| Isovalerylcarnitine          | Yes | Amino acid | Valine, leucine and isoleucine metabolism   |
| Isovalerylglycine            | Yes | Amino acid | Valine, leucine and isoleucine metabolism   |
| Leucine                      | Yes | Amino acid | Valine, leucine and isoleucine metabolism   |
| N_acetylisoleucine           | Yes | Amino acid | Valine, leucine and isoleucine metabolism   |
| N_acetylleucine              | Yes | Amino acid | Valine, leucine and isoleucine              |

|                               |     |                                         |                                                                               |
|-------------------------------|-----|-----------------------------------------|-------------------------------------------------------------------------------|
|                               |     |                                         | metabolism                                                                    |
| N_acetylvaline                | Yes | Amino acid                              | Valine, leucine and isoleucine metabolism                                     |
| Tiglyl_carnitine              | Yes | Amino acid                              | Valine, leucine and isoleucine metabolism                                     |
| Valine                        | Yes | Amino acid                              | Valine, leucine and isoleucine metabolism                                     |
| _3_ureidopropionate           | Yes | Amino acid;<br>nucleotide               | Alanine and aspartate metabolism;<br>pyrimidine metabolism, uracil containing |
| Beta_alanine                  | Yes | Amino acid;<br>nucleotide               | Alanine and aspartate metabolism;<br>pyrimidine metabolism, uracil containing |
| N_acetyl_beta_alanine         | Yes | Amino acid;<br>nucleotide               | Alanine and aspartate metabolism;<br>pyrimidine metabolism, uracil containing |
| Levulinate__4_oxovalerate_    | Yes | Amino acid;<br>xenobiotics              | Valine, leucine and isoleucine metabolism; food component/plant               |
| Erythronate                   | Yes | Carbohydrate                            | Aminosugar metabolism                                                         |
| Fucose                        | Yes | Carbohydrate                            | Aminosugar metabolism; pentose metabolism                                     |
| Fructose                      | Yes | Carbohydrate                            | Fructose, mannose, galactose, starch, and sucrose metabolism                  |
| Mannitol                      | Yes | Carbohydrate                            | Fructose, mannose, galactose, starch, and sucrose metabolism                  |
| Mannose                       | Yes | Carbohydrate                            | Fructose, mannose, galactose, starch, and sucrose metabolism                  |
| _1_5_anhydroglucitol__1_5_ag_ | Yes | Carbohydrate                            | Glycolysis, gluconeogenesis, pyruvate metabolism                              |
| Glucose                       | Yes | Carbohydrate                            | Glycolysis, gluconeogenesis, pyruvate metabolism                              |
| Glycerate                     | Yes | Carbohydrate                            | Glycolysis, gluconeogenesis, pyruvate metabolism                              |
| Lactate                       | Yes | Carbohydrate                            | Glycolysis, gluconeogenesis, pyruvate metabolism                              |
| Pyruvate                      | Yes | Carbohydrate                            | Glycolysis, gluconeogenesis, pyruvate metabolism                              |
| Arabinose                     | Yes | Carbohydrate                            | Pentose metabolism                                                            |
| Arabitol                      | Yes | Carbohydrate                            | Pentose metabolism                                                            |
| Ribitol                       | Yes | Carbohydrate                            | Pentose metabolism                                                            |
| Ribose                        | Yes | Carbohydrate                            | Pentose metabolism                                                            |
| Ribulose                      | Yes | Carbohydrate                            | Pentose metabolism                                                            |
| Threitol                      | Yes | Carbohydrate                            | Pentose metabolism                                                            |
| Xylitol                       | Yes | Carbohydrate                            | Pentose metabolism                                                            |
| Xylonate                      | Yes | Carbohydrate                            | Pentose metabolism                                                            |
| Xylose                        | Yes | Carbohydrate                            | Pentose metabolism                                                            |
| Oxalate__ethanedioate_        | Yes | Carbohydrate;<br>cofactors and vitamins | Glyoxylate and dicarboxylate metabolism; ascorbate and aldarate metabolism    |

|                               |     |                              |                                                                        |
|-------------------------------|-----|------------------------------|------------------------------------------------------------------------|
| _1_6_anhydroglucose           | Yes | Carbohydrate;<br>xenobiotics | Glycolysis, gluconeogenesis, pyruvate metabolism; food component/plant |
| Gluconate                     | Yes | Carbohydrate;<br>xenobiotics | Pentose metabolism; food component/plant                               |
| Arabonate                     | Yes | Cofactors and<br>vitamins    | Ascorbate and aldarate metabolism                                      |
| Ascorbate__vitamin_c_         | Yes | Cofactors and<br>vitamins    | Ascorbate and aldarate metabolism                                      |
| Threonate                     | Yes | Cofactors and<br>vitamins    | Ascorbate and aldarate metabolism                                      |
| Bilirubin__e_e_               | Yes | Cofactors and<br>vitamins    | Hemoglobin and porphyrin metabolism                                    |
| Bilirubin__z_z_               | Yes | Cofactors and<br>vitamins    | Hemoglobin and porphyrin metabolism                                    |
| Biliverdin                    | Yes | Cofactors and<br>vitamins    | Hemoglobin and porphyrin metabolism                                    |
| Heme                          | Yes | Cofactors and<br>vitamins    | Hemoglobin and porphyrin metabolism                                    |
| L_urobilin                    | Yes | Cofactors and<br>vitamins    | Hemoglobin and porphyrin metabolism                                    |
| N1_methyl_2_pyridone_5_carbox | Yes | Cofactors and<br>vitamins    | Nicotinate and nicotinamide metabolism                                 |
| Nicotinamide                  | Yes | Cofactors and<br>vitamins    | Nicotinate and nicotinamide metabolism                                 |
| Trigonelline__n__methylnicoti | Yes | Cofactors and<br>vitamins    | Nicotinate and nicotinamide metabolism                                 |
| Pantothenate                  | Yes | Cofactors and<br>vitamins    | Pantothenate and coa metabolism                                        |
| Riboflavin__vitamin_b2_       | Yes | Cofactors and<br>vitamins    | Riboflavin metabolism                                                  |
| Alpha_tocopherol              | Yes | Cofactors and<br>vitamins    | Tocopherol metabolism                                                  |
| Beta_tocopherol               | Yes | Cofactors and<br>vitamins    | Tocopherol metabolism                                                  |
| Gamma_cehc                    | Yes | Cofactors and<br>vitamins    | Tocopherol metabolism                                                  |
| Gamma_cehc_glucuronide        | Yes | Cofactors and<br>vitamins    | Tocopherol metabolism                                                  |
| Gamma_tocopherol              | Yes | Cofactors and<br>vitamins    | Tocopherol metabolism                                                  |
| Pyridoxate                    | Yes | Cofactors and<br>vitamins    | Vitamin b6 metabolism; pyridoxal metabolism                            |
| Alpha_ketoglutarate           | Yes | Energy                       | Krebs cycle / tca cycle                                                |
| Citrate                       | Yes | Energy                       | Krebs cycle / tca cycle                                                |
| Fumarate                      | Yes | Energy                       | Krebs cycle / tca cycle                                                |
| Malate                        | Yes | Energy                       | Krebs cycle / tca cycle                                                |
| Succinate                     | Yes | Energy                       | Krebs cycle / tca cycle                                                |
| Succinylcarnitine             | Yes | Energy                       | Krebs cycle / tca cycle                                                |
| Phosphate                     | Yes | Energy                       | Oxidative phosphorylation                                              |
| _15_methylpalmitate__isobar_w | Yes | Lipid                        |                                                                        |

|                           |     |       |                                                              |
|---------------------------|-----|-------|--------------------------------------------------------------|
| Acetylcarnitine           | Yes | Lipid | Carnitine metabolism                                         |
| Carnitine                 | Yes | Lipid | Carnitine metabolism                                         |
| Cis_4_decenoyl_carnitine  | Yes | Lipid | Carnitine metabolism                                         |
| Decanoylcarnitine         | Yes | Lipid | Carnitine metabolism                                         |
| Deoxycarnitine            | Yes | Lipid | Carnitine metabolism                                         |
| Hexanoylcarnitine         | Yes | Lipid | Carnitine metabolism                                         |
| Laurylcarnitine           | Yes | Lipid | Carnitine metabolism                                         |
| Myristoylcarnitine        | Yes | Lipid | Carnitine metabolism                                         |
| Octanoylcarnitine         | Yes | Lipid | Carnitine metabolism                                         |
| Oleoylcarnitine           | Yes | Lipid | Carnitine metabolism                                         |
| Palmitoylcarnitine        | Yes | Lipid | Carnitine metabolism                                         |
| Stearoylcarnitine         | Yes | Lipid | Carnitine metabolism                                         |
| _1_2_dipalmitoylglycerol  | Yes | Lipid | Diacylglycerol                                               |
| _1_3_dipalmitoylglycerol  | Yes | Lipid | Diacylglycerol                                               |
| _12_hete                  | Yes | Lipid | Eicosanoid                                                   |
| Oleic_ethanolamide        | Yes | Lipid | Endocannabinoid                                              |
| Palmitoyl_ethanolamide    | Yes | Lipid | Endocannabinoid                                              |
| Dihomo_linolenate         | Yes | Lipid | Essential fatty acid; polyunsaturated fatty acid (n3 and n6) |
| Docosahexaenoate          | Yes | Lipid | Essential fatty acid; polyunsaturated fatty acid (n3 and n6) |
| Docosapentaenoat          | Yes | Lipid | Essential fatty acid; polyunsaturated fatty acid (n3 and n6) |
| Docosapentaenoate         | Yes | Lipid | Essential fatty acid; polyunsaturated fatty acid (n3 and n6) |
| Eicosapentaenoate         | Yes | Lipid | Essential fatty acid; polyunsaturated fatty acid (n3 and n6) |
| Linoleate__18_2n6_        | Yes | Lipid | Essential fatty acid; polyunsaturated fatty acid (n3 and n6) |
| Linolenate_alpha_or_gamma | Yes | Lipid | Essential fatty acid; polyunsaturated fatty acid (n3 and n6) |
| Butyrylcarnitine          | Yes | Lipid | Fatty acid metabolism (also BCAA metabolism)                 |
| Hydroxybutyrylcarnitine   | Yes | Lipid | Fatty acid metabolism (also BCAA metabolism)                 |
| Propionylcarnitine        | Yes | Lipid | Fatty acid metabolism (also BCAA metabolism)                 |
| Valerylcarnitine          | Yes | Lipid | Fatty acid metabolism; carnitine metabolism                  |
| _2_aminooctanoate         | Yes | Lipid | Fatty acid, amino                                            |
| _17_methylstearate        | Yes | Lipid | Fatty acid, branched                                         |
| _2_hydroxyglutarate       | Yes | Lipid | Fatty acid, dicarboxylate                                    |
| Azelate__nonanedioate_    | Yes | Lipid | Fatty acid, dicarboxylate                                    |
| Cmpf                      | Yes | Lipid | Fatty acid, dicarboxylate                                    |
| Dodecanedioate            | Yes | Lipid | Fatty acid, dicarboxylate                                    |
| Hexadecanedioate          | Yes | Lipid | Fatty acid, dicarboxylate                                    |
| Octadecanedioate          | Yes | Lipid | Fatty acid, dicarboxylate                                    |



|                               |     |       |                                                               |
|-------------------------------|-----|-------|---------------------------------------------------------------|
| Sebacate__decanedioate__      | Yes | Lipid | Fatty acid, dicarboxylate                                     |
| Tetradecanedioate             | Yes | Lipid | Fatty acid, dicarboxylate                                     |
| Undecanedioate                | Yes | Lipid | Fatty acid, dicarboxylate                                     |
| _13_hode__9_hode              | Yes | Lipid | Fatty acid, monohydroxy                                       |
| _2_hydroxyoctanoate           | Yes | Lipid | Fatty acid, monohydroxy                                       |
| _2_hydroxypalmitate           | Yes | Lipid | Fatty acid, monohydroxy                                       |
| _2_hydroxystearate            | Yes | Lipid | Fatty acid, monohydroxy                                       |
| _3_hydroxydecanoate           | Yes | Lipid | Fatty acid, monohydroxy                                       |
| _3_hydroxyoctanoate           | Yes | Lipid | Fatty acid, monohydroxy                                       |
| _3_hydroxypropanoate          | Yes | Lipid | Fatty acid, monohydroxy                                       |
| Glycerol                      | Yes | Lipid | Glycerolipid metabolism                                       |
| Glycerol_3_phosphate__g3p__   | Yes | Lipid | Glycerolipid metabolism                                       |
| Choline                       | Yes | Lipid | Glycerolipid metabolism; phospholipid metabolism              |
| Glycerophosphorylcholine__gpc | Yes | Lipid | Glycerolipid metabolism; phospholipid metabolism              |
| Trimethylamine_n_oxide        | Yes | Lipid | Glycerolipid metabolism; phospholipid metabolism              |
| Chiro_inositol                | Yes | Lipid | Inositol metabolism                                           |
| Inositol_1_phosphate__i1p__   | Yes | Lipid | Inositol metabolism                                           |
| Myo_inositol                  | Yes | Lipid | Inositol metabolism                                           |
| _3_hydroxybutyrate__bhba__    | Yes | Lipid | Ketone bodies                                                 |
| Acetoacetate                  | Yes | Lipid | Ketone bodies                                                 |
| _10_heptadecenoate__17_1n7__  | Yes | Lipid | Long chain fatty acid                                         |
| _10_nonadecenoate__19_1n9__   | Yes | Lipid | Long chain fatty acid                                         |
| Eicosenoate__20_1n9_or_11__   | Yes | Lipid | Long chain fatty acid                                         |
| Margarate__17_0__             | Yes | Lipid | Long chain fatty acid                                         |
| Myristate__14_0__             | Yes | Lipid | Long chain fatty acid                                         |
| Myristoleate__14_1n5__        | Yes | Lipid | Long chain fatty acid                                         |
| Nonadecanoate__19_0__         | Yes | Lipid | Long chain fatty acid                                         |
| Oleate__18_1n9__              | Yes | Lipid | Long chain fatty acid                                         |
| Palmitate__16_0__             | Yes | Lipid | Long chain fatty acid                                         |
| Palmitoleate__16_1n7__        | Yes | Lipid | Long chain fatty acid                                         |
| Pentadecanoate__15_0__        | Yes | Lipid | Long chain fatty acid                                         |
| Stearate__18_0__              | Yes | Lipid | Long chain fatty acid                                         |
| Adrenate__22_4n6__            | Yes | Lipid | Long chain fatty acid; polyunsaturated fatty acid (N3 and N6) |
| Arachidonate__20_4n6__        | Yes | Lipid | Long chain fatty acid; polyunsaturated fatty acid (N3 and N6) |
| Dihomo_linoleate__20_2n6__    | Yes | Lipid | Long chain fatty acid; polyunsaturated fatty acid (N3 and N6) |
| Docosadienoate__22_2n6__      | Yes | Lipid | Long chain fatty acid; polyunsaturated fatty acid (N3 and N6) |
| Docosatrienoate               | Yes | Lipid | Long chain fatty acid; polyunsaturated fatty acid (N3 and N6) |
| Stearidonate__18_4n3__        | Yes | Lipid | Long chain fatty acid; polyunsaturated                        |

|                               |     |       |                              |
|-------------------------------|-----|-------|------------------------------|
|                               |     |       | fatty acid (N3 and N6)       |
| _1_arachidonoylglycerophoscho | Yes | Lipid | Lysolipid                    |
| _1_arachidonoylglycerophoseth | Yes | Lipid | Lysolipid                    |
| _1_arachidonoylglycerophosino | Yes | Lipid | Lysolipid                    |
| _1_linoleoylglycerophosphocho | Yes | Lipid | Lysolipid                    |
| _1_linoleoylglycerophosphoeth | Yes | Lipid | Lysolipid                    |
| _1_linoleoylglycerophosphoino | Yes | Lipid | Lysolipid                    |
| _1_oleoylglycerophosphocholin | Yes | Lipid | Lysolipid                    |
| _1_oleoylglycerophosphoethano | Yes | Lipid | Lysolipid                    |
| _1_oleoylglycerophosphoinosit | Yes | Lipid | Lysolipid                    |
| _1_palmitoleoylglycerophospho | Yes | Lipid | Lysolipid                    |
| _1_palmitoylglycerophosphocho | Yes | Lipid | Lysolipid                    |
| _1_palmitoylglycerophosphoeth | Yes | Lipid | Lysolipid                    |
| _1_palmitoylglycerophosphoino | Yes | Lipid | Lysolipid                    |
| _1_palmitoylplasmenylethanol  | Yes | Lipid | Lysolipid                    |
| _1_stearoylglycerophosphochol | Yes | Lipid | Lysolipid                    |
| _1_stearoylglycerophosphoetha | Yes | Lipid | Lysolipid                    |
| _1_stearoylglycerophosphoinos | Yes | Lipid | Lysolipid                    |
| _2_palmitoylglycerophosphocho | Yes | Lipid | Lysolipid                    |
| _2_stearoylglycerophosphochol | Yes | Lipid | Lysolipid                    |
| _2_stearoylglycerophosphoetha | Yes | Lipid | Lysolipid                    |
| Stearoyl_linoleoyl_gppe_1     | Yes | Lipid | Lysolipid                    |
| _10_undecenoate__11_1n1_      | Yes | Lipid | Medium chain fatty acid      |
| _5_dodecenoate__12_1n7_       | Yes | Lipid | Medium chain fatty acid      |
| Caprate__10_0_                | Yes | Lipid | Medium chain fatty acid      |
| Caproate__6_0_                | Yes | Lipid | Medium chain fatty acid      |
| Caprylate__8_0_               | Yes | Lipid | Medium chain fatty acid      |
| Heptanoate__7_0_              | Yes | Lipid | Medium chain fatty acid      |
| Laurate__12_0_                | Yes | Lipid | Medium chain fatty acid      |
| Pelargonate__9_0_             | Yes | Lipid | Medium chain fatty acid      |
| _1_arachidonylglycerol        | Yes | Lipid | Monoacylglycerol             |
| _1_linoleoylglycero           | Yes | Lipid | Monoacylglycerol             |
| _1_myristoylglycerol          | Yes | Lipid | Monoacylglycerol             |
| _1_oleoylglycero              | Yes | Lipid | Monoacylglycerol             |
| _1_palmitoylglycerol          | Yes | Lipid | Monoacylglycerol             |
| _1_pentadecanoylglycerol      | Yes | Lipid | Monoacylglycerol             |
| _1_stearoylglycero            | Yes | Lipid | Monoacylglycerol             |
| _2_linoleoylglycerol__2_monol | Yes | Lipid | Monoacylglycerol             |
| _2_myristoylglycerol          | Yes | Lipid | Monoacylglycerol             |
| _2_palmitoylglycerol          | Yes | Lipid | Monoacylglycerol             |
| Cholate                       | Yes | Lipid | Primary bile acid metabolism |
| Glycochenodeoxycholate        | Yes | Lipid | Primary bile acid metabolism |
| Glycocholate                  | Yes | Lipid | Primary bile acid metabolism |

|                               |     |                    |                                                                  |
|-------------------------------|-----|--------------------|------------------------------------------------------------------|
| Taurochenodeoxycholate        | Yes | Lipid              | Primary bile acid metabolism                                     |
| Taurocholate                  | Yes | Lipid              | Primary bile acid metabolism                                     |
| Glycocholate_sulfate          | Yes | Lipid              | Secondary bile acid metabolism                                   |
| Glycodeoxycholate             | Yes | Lipid              | Secondary bile acid metabolism                                   |
| Glycohyocholate               | Yes | Lipid              | Secondary bile acid metabolism                                   |
| Glycolithocholate_sulfate     | Yes | Lipid              | Secondary bile acid metabolism                                   |
| Glycoursodeoxycholate         | Yes | Lipid              | Secondary bile acid metabolism                                   |
| Taurocholate_sulfate          | Yes | Lipid              | Secondary bile acid metabolism                                   |
| Taurodeoxycholate             | Yes | Lipid              | Secondary bile acid metabolism                                   |
| Taurolithocholate_3_sulfate   | Yes | Lipid              | Secondary bile acid metabolism                                   |
| Tauroursodeoxycholate         | Yes | Lipid              | Secondary bile acid metabolism                                   |
| Valerate                      | Yes | Lipid              | Short chain fatty acid                                           |
| Palmitoyl_sphingomyelin       | Yes | Lipid              | Sphingolipid metabolism                                          |
| Sphinganine                   | Yes | Lipid              | Sphingolipid metabolism                                          |
| Sphingosine                   | Yes | Lipid              | Sphingolipid metabolism                                          |
| Stearoyl_sphingomyelin        | Yes | Lipid              | Sphingolipid metabolism                                          |
| _21_hydroxypregnenolone_disul | Yes | Lipid              | Sterol/steroid                                                   |
| _4_androsten_3beta_17beta_d_1 | Yes | Lipid              | Sterol/steroid                                                   |
| _4_androsten_3beta_17beta_d_2 | Yes | Lipid              | Sterol/steroid                                                   |
| _5a_androstan_3a_17bdd        | Yes | Lipid              | Sterol/steroid                                                   |
| _5alpha_androstan_3beta_17alp | Yes | Lipid              | Sterol/steroid                                                   |
| _5alpha_androstan_3beta_17bet | Yes | Lipid              | Sterol/steroid                                                   |
| _5alpha_pregnan_3beta_20add   | Yes | Lipid              | Sterol/steroid                                                   |
| _7_hoca                       | Yes | Lipid              | Sterol/steroid                                                   |
| Andro_steroid_monosulfate_1   | Yes | Lipid              | Sterol/steroid                                                   |
| Androsterone_sulfate          | Yes | Lipid              | Sterol/steroid                                                   |
| Campesterol                   | Yes | Lipid              | Sterol/steroid                                                   |
| Cholesterol                   | Yes | Lipid              | Sterol/steroid                                                   |
| Corticosterone                | Yes | Lipid              | Sterol/steroid                                                   |
| Cortisol                      | Yes | Lipid              | Sterol/steroid                                                   |
| Cortisone                     | Yes | Lipid              | Sterol/steroid                                                   |
| Dhea_s                        | Yes | Lipid              | Sterol/steroid                                                   |
| Epiandrosterone_sulfate       | Yes | Lipid              | Sterol/steroid                                                   |
| Lathosterol                   | Yes | Lipid              | Sterol/steroid                                                   |
| Pregn_steroid_monosulfate     | Yes | Lipid              | Sterol/steroid                                                   |
| Pregnanediol_3_glucuronide    | Yes | Lipid              | Sterol/steroid                                                   |
| Pregnen_diol_disulfate        | Yes | Lipid              | Sterol/steroid                                                   |
| Pregnenolone_sulfate          | Yes | Lipid              | Sterol/steroid                                                   |
| Isovalerate                   | Yes | Lipid; amino acid  | Fatty acid metabolism; valine, leucine and isoleucine metabolism |
| _1_2_propanediol              | Yes | Lipid; xenobiotics | Chemical; ketone bodies                                          |
| Hypoxanthine                  | Yes | Nucleotide         | Purine metabolism, (hypo)xanthine/inosine containing             |

|                               |     |            |                                                                                                 |
|-------------------------------|-----|------------|-------------------------------------------------------------------------------------------------|
| Inosine                       | Yes | Nucleotide | Purine metabolism,<br>(hypo)xanthine/inosine containing                                         |
| Xanthine                      | Yes | Nucleotide | Purine metabolism,<br>(hypo)xanthine/inosine containing                                         |
| Adenine                       | Yes | Nucleotide | Purine metabolism, adenine containing                                                           |
| Adenosine                     | Yes | Nucleotide | Purine metabolism, adenine containing                                                           |
| N1_methyladenosine            | Yes | Nucleotide | Purine metabolism, adenine containing                                                           |
| N6_methyladenosine            | Yes | Nucleotide | Purine metabolism, adenine containing                                                           |
| _7_methylguanine              | Yes | Nucleotide | Purine metabolism, guanine containing                                                           |
| Guanosine                     | Yes | Nucleotide | Purine metabolism, guanine containing                                                           |
| N1_methylguanosine            | Yes | Nucleotide | Purine metabolism, guanine containing                                                           |
| N2_n2_dimethylguanosine       | Yes | Nucleotide | Purine metabolism, guanine containing                                                           |
| N6_carbamoylthreonyladenosine | Yes | Nucleotide | Purine metabolism, guanine containing;<br>purine metabolism, adenine containing                 |
| Allantoin                     | Yes | Nucleotide | Purine metabolism, urate metabolism;<br>purine metabolism,<br>(hypo)xanthine/inosine containing |
| Urate                         | Yes | Nucleotide | Purine metabolism, urate metabolism;<br>purine metabolism,<br>(hypo)xanthine/inosine containing |
| Cytidine                      | Yes | Nucleotide | Pyrimidine metabolism, cytidine<br>containing                                                   |
| _5_6_dihydrothymine           | Yes | Nucleotide | Pyrimidine metabolism, thymine<br>containing                                                    |
| _5_6_dihydrouracil            | Yes | Nucleotide | Pyrimidine metabolism, uracil<br>containing                                                     |
| _5_methyluridine__ribothymidi | Yes | Nucleotide | Pyrimidine metabolism, uracil<br>containing                                                     |
| Pseudouridine                 | Yes | Nucleotide | Pyrimidine metabolism, uracil<br>containing                                                     |
| Uridine                       | Yes | Nucleotide | Pyrimidine metabolism, uracil<br>containing                                                     |
| Glutamine_leucine             | Yes | Peptide    | Dipeptide                                                                                       |
| Glycylleucine                 | Yes | Peptide    | Dipeptide                                                                                       |
| Glycylvaline                  | Yes | Peptide    | Dipeptide                                                                                       |
| Isoleucylglycine              | Yes | Peptide    | Dipeptide                                                                                       |
| Leucylglycine                 | Yes | Peptide    | Dipeptide                                                                                       |
| Phenylalanylalanine           | Yes | Peptide    | Dipeptide                                                                                       |
| Phenylalanylglycine           | Yes | Peptide    | Dipeptide                                                                                       |
| Threonylphenylalanine         | Yes | Peptide    | Dipeptide                                                                                       |
| Adsgegdffaeggvr               | Yes | Peptide    | Fibrinogen cleavage peptide                                                                     |
| Dsgegdffaeggvr                | Yes | Peptide    | Fibrinogen cleavage peptide                                                                     |
| Gamma_glutamylalanine         | Yes | Peptide    | Gamma-glutamyl amino acid                                                                       |
| Gamma_glutamylglutamate       | Yes | Peptide    | Gamma-glutamyl amino acid                                                                       |
| Gamma_glutamylglutamine       | Yes | Peptide    | Gamma-glutamyl amino acid                                                                       |
| Gamma_glutamylisoleucine      | Yes | Peptide    | Gamma-glutamyl amino acid                                                                       |
| Gamma_glutamylleucine         | Yes | Peptide    | Gamma-glutamyl amino acid                                                                       |

|                               |     |                     |                                                        |
|-------------------------------|-----|---------------------|--------------------------------------------------------|
| Gamma_glutamylmethionine      | Yes | Peptide             | Gamma-glutamyl amino acid                              |
| Gamma_glutamylphenylalanine   | Yes | Peptide             | Gamma-glutamyl amino acid                              |
| Gamma_glutamylthreonine       | Yes | Peptide             | Gamma-glutamyl amino acid                              |
| Gamma_glutamyltryptophan      | Yes | Peptide             | Gamma-glutamyl amino acid                              |
| Gamma_glutamyltyrosine        | Yes | Peptide             | Gamma-glutamyl amino acid                              |
| Gamma_glutamylvaline          | Yes | Peptide             | Gamma-glutamyl amino acid                              |
| Bradykinin__des_arg_9_        | Yes | Peptide             | Polypeptide                                            |
| Hwesasxx                      | Yes | Peptide             | Polypeptide                                            |
| Cys_gly__oxidized             | Yes | Peptide; amino acid | Dipeptide derivative; glutathione metabolism           |
| Pro_hydroxy_pro               | Yes | Peptide; amino acid | Dipeptide; urea cycle; arginine and proline metabolism |
| _2_ethylphenylsulfate         | Yes | Xenobiotics         | Benzoate metabolism                                    |
| _2_hydroxyhippurate__salicylu | Yes | Xenobiotics         | Benzoate metabolism                                    |
| _3_ethylphenylsulfate         | Yes | Xenobiotics         | Benzoate metabolism                                    |
| _3_hydroxyhippurate           | Yes | Xenobiotics         | Benzoate metabolism                                    |
| _3_methyl_catechol_sulfate_1  | Yes | Xenobiotics         | Benzoate metabolism                                    |
| _3_methyl_catechol_sulfate_2  | Yes | Xenobiotics         | Benzoate metabolism                                    |
| _4_ethylphenylsulfate         | Yes | Xenobiotics         | Benzoate metabolism                                    |
| _4_hydroxyhippurate           | Yes | Xenobiotics         | Benzoate metabolism                                    |
| _4_methylcatechol_sulfate     | Yes | Xenobiotics         | Benzoate metabolism                                    |
| _4_vinylphenol_sulfate        | Yes | Xenobiotics         | Benzoate metabolism                                    |
| Benzoate                      | Yes | Xenobiotics         | Benzoate metabolism                                    |
| Catechol_sulfate              | Yes | Xenobiotics         | Benzoate metabolism                                    |
| Hippurate                     | Yes | Xenobiotics         | Benzoate metabolism                                    |
| O_methylcatechol_sulfate      | Yes | Xenobiotics         | Benzoate metabolism                                    |
| _2_aminophenol_sulfate        | Yes | Xenobiotics         | Chemical                                               |
| Glycolate__hydroxyacetate_    | Yes | Xenobiotics         | Chemical                                               |
| _2_piperidinone               | Yes | Xenobiotics         | Chemical; food component/plant                         |
| Ethyl_glucuronide             | Yes | Xenobiotics         | Detoxification metabolism; chemical                    |
| _4_acetylphenol_sulfate       | Yes | Xenobiotics         | Drug                                                   |
| Atenolol                      | Yes | Xenobiotics         | Drug                                                   |
| Hydroquinone_sulfate          | Yes | Xenobiotics         | Drug                                                   |
| Metoprolol_acid_metabolite    | Yes | Xenobiotics         | Drug                                                   |
| Salicylate                    | Yes | Xenobiotics         | Drug                                                   |
| Salicyluric_glucuronide       | Yes | Xenobiotics         | Drug                                                   |
| Cinnamoylglycine              | Yes | Xenobiotics         | Food component/plant                                   |
| Dihydroferulic_acid           | Yes | Xenobiotics         | Food component/plant                                   |
| Ergothioneine                 | Yes | Xenobiotics         | Food component/plant                                   |
| Homostachydrine               | Yes | Xenobiotics         | Food component/plant                                   |
| N__2_furoyl_glycine           | Yes | Xenobiotics         | Food component/plant                                   |
| Piperine                      | Yes | Xenobiotics         | Food component/plant                                   |
| Quinate                       | Yes | Xenobiotics         | Food component/plant                                   |
| Saccharin                     | Yes | Xenobiotics         | Food component/plant                                   |

|                               |     |             |                                                       |
|-------------------------------|-----|-------------|-------------------------------------------------------|
| Solanidine                    | Yes | Xenobiotics | Food component/plant                                  |
| Stachydrine                   | Yes | Xenobiotics | Food component/plant                                  |
| Thymol_sulfate                | Yes | Xenobiotics | Food component/plant                                  |
| Erythritol                    | Yes | Xenobiotics | Sugar, sugar substitute, starch; food component/plant |
| _3_hydroxycotinine_glucuronid | Yes | Xenobiotics | Tobacco metabolite                                    |
| Cotinine                      | Yes | Xenobiotics | Tobacco metabolite                                    |
| Cotinine_n_oxide              | Yes | Xenobiotics | Tobacco metabolite                                    |
| Hydroxycotinine               | Yes | Xenobiotics | Tobacco metabolite                                    |
| _1_3_7_trimethylurate         | Yes | Xenobiotics | Xanthine metabolism                                   |
| _1_3_dimethylurate            | Yes | Xenobiotics | Xanthine metabolism                                   |
| _1_7_dimethylurate            | Yes | Xenobiotics | Xanthine metabolism                                   |
| _1_methylurate                | Yes | Xenobiotics | Xanthine metabolism                                   |
| _1_methylxanthine             | Yes | Xenobiotics | Xanthine metabolism                                   |
| _3_7_dimethylurate            | Yes | Xenobiotics | Xanthine metabolism                                   |
| _3_methylxanthine             | Yes | Xenobiotics | Xanthine metabolism                                   |
| _5_acetylamino_6_amino_3_meth | Yes | Xenobiotics | Xanthine metabolism                                   |
| _5_acetylamino_6_formylamino_ | Yes | Xenobiotics | Xanthine metabolism                                   |
| _7_methylxanthine             | Yes | Xenobiotics | Xanthine metabolism                                   |
| Caffeine                      | Yes | Xenobiotics | Xanthine metabolism                                   |
| Paraxanthine                  | Yes | Xenobiotics | Xanthine metabolism                                   |
| Theophylline                  | Yes | Xenobiotics | Xanthine metabolism                                   |
| N_acetylaspartate__naa_       | No  | Amino acid  | Alanine and aspartate metabolism                      |
| Guanidinoacetate              | No  | Amino acid  | Creatine metabolism                                   |
| Alpha_ketobutyrate            | No  | Amino acid  | Cysteine, methionine, sam, taurine metabolism         |
| Cysteine_s_sulfate            | No  | Amino acid  | Cysteine, methionine, sam, taurine metabolism         |
| Hypotaurine                   | No  | Amino acid  | Cysteine, methionine, sam, taurine metabolism         |
| Methionine_sulfone            | No  | Amino acid  | Cysteine, methionine, sam, taurine metabolism         |
| Methionine_sulfoxide          | No  | Amino acid  | Cysteine, methionine, sam, taurine metabolism         |
| N_acetyltaurine               | No  | Amino acid  | Cysteine, methionine, sam, taurine metabolism         |
| S_adenosylhomocysteine__sah_  | No  | Amino acid  | Cysteine, methionine, sam, taurine metabolism         |
| N_acetylglutamate             | No  | Amino acid  | Glutamate metabolism                                  |
| N_acetylglutamine             | No  | Amino acid  | Glutamate metabolism                                  |
| Naag                          | No  | Amino acid  | Glutamate metabolism                                  |
| Glutathione__reduced__gsh_    | No  | Amino acid  | Glutathione metabolism                                |
| _2_phenylglycine              | No  | Amino acid  | Glycine, serine and threonine metabolism              |
| Beta_hydroxypyruvate          | No  | Amino acid  | Glycine, serine and threonine metabolism              |

|                                |    |            |                                                              |
|--------------------------------|----|------------|--------------------------------------------------------------|
| Sarcosine__n_methylglycine_    | No | Amino acid | Glycine, serine and threonine metabolism                     |
| Guanidinosuccinate             | No | Amino acid | Guanidino and acetamido metabolism                           |
| _4_imidazoleacetate            | No | Amino acid | Histidine metabolism                                         |
| Hydantoin_5_propionic_acid     | No | Amino acid | Histidine metabolism                                         |
| Imidazole_lactate              | No | Amino acid | Histidine metabolism                                         |
| N_acetyl_1_methylhistidine     | No | Amino acid | Histidine metabolism                                         |
| N_acetyl_3_methylhistidine     | No | Amino acid | Histidine metabolism                                         |
| N_acetylhistidine              | No | Amino acid | Histidine metabolism                                         |
| _3_methylglutaryl_carnitine_1  | No | Amino acid | Lysine metabolism                                            |
| _3_methylglutaryl_carnitine_2  | No | Amino acid | Lysine metabolism                                            |
| _6_oxopiperidine_2_carboxylic  | No | Amino acid | Lysine metabolism                                            |
| Glutarate__pentanedioate_      | No | Amino acid | Lysine metabolism                                            |
| N_6_trimethyllysine            | No | Amino acid | Lysine metabolism                                            |
| N2_acetyllysine                | No | Amino acid | Lysine metabolism                                            |
| _3_methylglutaconate           | No | Amino acid | Lysine metabolism; valine, leucine and isoleucine metabolism |
| _3__3__sulfooxy_phenyl_propan  | No | Amino acid | Phenylalanine & tyrosine metabolism                          |
| _3__4__hydroxyphenyl_propionat | No | Amino acid | Phenylalanine & tyrosine metabolism                          |
| _3__4__dimethoxy_hydrocinnamic | No | Amino acid | Phenylalanine & tyrosine metabolism                          |
| _3_methoxytyramine_sulfate     | No | Amino acid | Phenylalanine & tyrosine metabolism                          |
| _4_hydroxyphenylacetate        | No | Amino acid | Phenylalanine & tyrosine metabolism                          |
| _5_hydroxymethyl_2_furoic_aci  | No | Amino acid | Phenylalanine & tyrosine metabolism                          |
| Dopamine_sulfate_1             | No | Amino acid | Phenylalanine & tyrosine metabolism                          |
| Dopamine_sulfate_2             | No | Amino acid | Phenylalanine & tyrosine metabolism                          |
| Homovanillate__hva_            | No | Amino acid | Phenylalanine & tyrosine metabolism                          |
| N_formylphenylalanine          | No | Amino acid | Phenylalanine & tyrosine metabolism                          |
| P_cresol_glucuronide           | No | Amino acid | Phenylalanine & tyrosine metabolism                          |
| Phenylacetylcarnitine          | No | Amino acid | Phenylalanine & tyrosine metabolism                          |
| Phenylpyruvate                 | No | Amino acid | Phenylalanine & tyrosine metabolism                          |
| Thyroxine                      | No | Amino acid | Phenylalanine & tyrosine metabolism                          |
| Tyramine_o_sulfate             | No | Amino acid | Phenylalanine & tyrosine metabolism                          |
| Vanillylmandelate__vma_        | No | Amino acid | Phenylalanine & tyrosine metabolism                          |
| _5_hydroxyindoleacetate        | No | Amino acid | Tryptophan metabolism                                        |
| Indole_3_carboxylic_acid       | No | Amino acid | Tryptophan metabolism                                        |
| Indolebutyrate                 | No | Amino acid | Tryptophan metabolism                                        |
| Indolepyruvate                 | No | Amino acid | Tryptophan metabolism                                        |
| N_acetylkynurenine_2           | No | Amino acid | Tryptophan metabolism                                        |
| Picolinate                     | No | Amino acid | Tryptophan metabolism                                        |
| Serotonin__5ht_                | No | Amino acid | Tryptophan metabolism                                        |
| Xanthurenate                   | No | Amino acid | Tryptophan metabolism                                        |
| Homoarginine                   | No | Amino acid | Urea cycle; arginine and proline metabolism                  |
| N_acetylarginine               | No | Amino acid | Urea cycle; arginine and proline                             |

|                               |    |                         |                                                                                                  |
|-------------------------------|----|-------------------------|--------------------------------------------------------------------------------------------------|
|                               |    |                         | metabolism                                                                                       |
| N_acetylcitrulline            | No | Amino acid              | Urea cycle; arginine and proline metabolism                                                      |
| N_methylproline               | No | Amino acid              | Urea cycle; arginine and proline metabolism                                                      |
| N2_n5_diacetylornithine       | No | Amino acid              | Urea cycle; arginine and proline metabolism                                                      |
| Proline                       | No | Amino acid              | Urea cycle; arginine and proline metabolism                                                      |
| _2_methylbutyrylcarnitine     | No | Amino acid              | Valine, leucine and isoleucine metabolism                                                        |
| _2_methylbutyrylcarnitine     | No | Amino acid              | Valine, leucine and isoleucine metabolism                                                        |
| _2_methylbutyrylglycine       | No | Amino acid              | Valine, leucine and isoleucine metabolism                                                        |
| _3_methylcrotonylglycine      | No | Amino acid              | Valine, leucine and isoleucine metabolism                                                        |
| Allo_isoleucine               | No | Amino acid              | Valine, leucine and isoleucine metabolism                                                        |
| Alpha_hydroxyisovaleroyl_carn | No | Amino acid              | Valine, leucine and isoleucine metabolism                                                        |
| Beta_hydroxyisovaleroylcarnit | No | Amino acid              | Valine, leucine and isoleucine metabolism                                                        |
| Hydroxyisovaleroyl_carnitine  | No | Amino acid              | Valine, leucine and isoleucine metabolism                                                        |
| Isobutyrylglycine             | No | Amino acid              | Valine, leucine and isoleucine metabolism                                                        |
| Methylsuccinate               | No | Amino acid              | Valine, leucine and isoleucine metabolism                                                        |
| Tigloylglycine                | No | Amino acid              | Valine, leucine and isoleucine metabolism                                                        |
| N_oleoyltaurine               | No | Amino acid; lipid       | Cysteine, methionine, sam, taurine metabolism; endocannabinoid                                   |
| Oleoyltaurine                 | No | Amino acid; lipid       | Cysteine, methionine, sam, taurine metabolism; endocannabinoid                                   |
| Methyl_indole_3_acetate       | No | Amino acid; xenobiotics | Tryptophan metabolism; food component/plant                                                      |
| _2_hydroxyisobutyrate         | No | Amino acid; xenobiotics | Valine, leucine and isoleucine metabolism; chemical                                              |
| N_acetylneuraminate           | No | Carbohydrate            | Aminosugar metabolism                                                                            |
| Glucuronate                   | No | Carbohydrate            | Aminosugars metabolism; glycolysis, gluconeogenesis, pyruvate metabolism                         |
| Sucrose                       | No | Carbohydrate            | Disaccharides and oligosaccharides; fructose, mannose, galactose, starch, and sucrose metabolism |
| Galactonate                   | No | Carbohydrate            | Fructose, mannose, galactose, starch, and sucrose metabolism                                     |
| Methyl_beta_glucoopyranoside  | No | Carbohydrate            | Fructose, mannose, galactose, starch, and sucrose metabolism                                     |
| Sorbitol                      | No | Carbohydrate            | Fructose, mannose, galactose, starch, and sucrose metabolism                                     |



|                               |    |                                     |                                                                                   |
|-------------------------------|----|-------------------------------------|-----------------------------------------------------------------------------------|
| Sorbose                       | No | Carbohydrate                        | Fructose, mannose, galactose, starch, and sucrose metabolism                      |
| Isomaltose                    | No | Carbohydrate                        | Fructose, mannose, galactose, starch, and sucrose metabolism; glycogen metabolism |
| Maltose                       | No | Carbohydrate                        | Fructose, mannose, galactose, starch, and sucrose metabolism; glycogen metabolism |
| Maltotriose                   | No | Carbohydrate                        | Fructose, mannose, galactose, starch, and sucrose metabolism; glycogen metabolism |
| Maltotetraose                 | No | Carbohydrate                        | Glycogen metabolism                                                               |
| _1_3_dihydroxyacetone         | No | Carbohydrate                        | Glycolysis, gluconeogenesis, pyruvate metabolism                                  |
| Ribonate                      | No | Carbohydrate                        | Pentose metabolism                                                                |
| Xylulose                      | No | Carbohydrate                        | Pentose metabolism                                                                |
| Erythrulose                   | No | Carbohydrate; secondary metabolism  | Advanced glycation end-product                                                    |
| Gulonic_acid                  | No | Cofactors and vitamins              | Ascorbate and aldarate metabolism                                                 |
| Bilirubin__e_z_or_z_e_        | No | Cofactors and vitamins              | Hemoglobin and porphyrin metabolism                                               |
| I_urobilinogen                | No | Cofactors and vitamins              | Hemoglobin and porphyrin metabolism                                               |
| _1_methylnicotinamide         | No | Cofactors and vitamins              | Nicotinate and nicotinamide metabolism                                            |
| Nicotinate                    | No | Cofactors and vitamins              | Nicotinate and nicotinamide metabolism                                            |
| Quinolate                     | No | Cofactors and vitamins              | Nicotinate and nicotinamide metabolism                                            |
| Pyridoxal                     | No | Cofactors and vitamins              | Pyridoxal metabolism; vitamin b6 metabolism                                       |
| Flavin_adenine_dinucleotide   | No | Cofactors and vitamins              | Riboflavin metabolism                                                             |
| Biopterin                     | No | Cofactors and vitamins              | Tetrahydrobiopterin metabolism                                                    |
| Alpha_cehc                    | No | Cofactors and vitamins              | Tocopherol metabolism                                                             |
| Alpha_cehc_glucuronide        | No | Cofactors and vitamins              | Tocopherol metabolism                                                             |
| Alpha_cehc_sulfate            | No | Cofactors and vitamins              | Tocopherol metabolism                                                             |
| _2_3_dihydroxyisovalerate     | No | Cofactors and vitamins; xenobiotics | Pantothenate and coa metabolism; food component/plant                             |
| _2_methylcitrate              | No | Energy                              | Krebs cycle / tca cycle                                                           |
| Aconitate__cis_or_trans_      | No | Energy                              | Krebs cycle / tca cycle                                                           |
| Itaconate__methylenesuccinate | No | Energy                              | Krebs cycle / tca cycle                                                           |
| Acetylphosphate               | No | Energy                              | Oxidative phosphorylation                                                         |

|                               |    |        |                                              |
|-------------------------------|----|--------|----------------------------------------------|
| Pyrophosphate__ppi_           | No | Energy | Oxidative phosphorylation                    |
| _1_dihomo_linoleoylglyceroph  | No | Lipid  |                                              |
| _1_eicosadienoylglycerophosph | No | Lipid  |                                              |
| _1_gamma_linolenoylglycerol   | No | Lipid  |                                              |
| _1_heptadecanoylglycerophosph | No | Lipid  |                                              |
| _1_margaroylglycerophosphocho | No | Lipid  |                                              |
| _1_margaroylglycerophosphoeth | No | Lipid  |                                              |
| _3_methylglutaryl carnitine   | No | Lipid  |                                              |
| Hexenedioyl carnitine         | No | Lipid  |                                              |
| Hyocholate                    | No | Lipid  |                                              |
| _3_dehydrocarnitine           | No | Lipid  | Carnitine metabolism                         |
| Linoleoyl carnitine           | No | Lipid  | Carnitine metabolism                         |
| Myristoleoyl carnitine        | No | Lipid  | Carnitine metabolism                         |
| _2_methylmalonyl_carnitine    | No | Lipid  | Carnitine metabolism; fatty acid synthesis   |
| _20_hete                      | No | Lipid  | Eicosanoid                                   |
| _5_hepe                       | No | Lipid  | Eicosanoid                                   |
| _5_hete                       | No | Lipid  | Eicosanoid                                   |
| _5_oxoete                     | No | Lipid  | Eicosanoid                                   |
| Leukotriene_b4                | No | Lipid  | Eicosanoid                                   |
| Thromboxane_b2                | No | Lipid  | Eicosanoid                                   |
| N_palmitoyl_taurine           | No | Lipid  | Endocannabinoid                              |
| N_palmitoyltaurine            | No | Lipid  | Endocannabinoid                              |
| N_stearoyl_taurine            | No | Lipid  | Endocannabinoid                              |
| N_stearoyltaurine             | No | Lipid  | Endocannabinoid                              |
| Butyrylglycine                | No | Lipid  | Fatty acid metabolism (also bcaa metabolism) |
| Propionylglycine              | No | Lipid  | Fatty acid metabolism (also bcaa metabolism) |
| Hexanoylglycine               | No | Lipid  | Fatty acid metabolism(acyl glycine)          |
| N_linoleoylglycine            | No | Lipid  | Fatty acid metabolism(acyl glycine)          |
| N_octanoylglycine             | No | Lipid  | Fatty acid metabolism(acyl glycine)          |
| N_palmitoyl_glycine           | No | Lipid  | Fatty acid metabolism(acyl glycine)          |
| Malonyl carnitine             | No | Lipid  | Fatty acid synthesis                         |
| Stearamide                    | No | Lipid  | Fatty acid, amide                            |
| _13_methylmyristic_acid       | No | Lipid  | Fatty acid, branched                         |
| Pristanate                    | No | Lipid  | Fatty acid, branched                         |
| _1_11_undecanedicarboxylate   | No | Lipid  | Fatty acid, dicarboxylate                    |
| Adipate                       | No | Lipid  | Fatty acid, dicarboxylate                    |
| Eicosanodioate                | No | Lipid  | Fatty acid, dicarboxylate                    |
| Maleate__cis_butenedioate_    | No | Lipid  | Fatty acid, dicarboxylate                    |
| Pimelate__heptanedioate_      | No | Lipid  | Fatty acid, dicarboxylate                    |
| Suberate__octanedioate_       | No | Lipid  | Fatty acid, dicarboxylate                    |
| _12_13_dihome                 | No | Lipid  | Fatty acid, dihydroxy                        |

|                               |    |       |                                                               |
|-------------------------------|----|-------|---------------------------------------------------------------|
| _9_10_dihome                  | No | Lipid | Fatty acid, dihydroxy                                         |
| Methyl_linoleate              | No | Lipid | Fatty acid, methyl ester                                      |
| Methyl_stearate               | No | Lipid | Fatty acid, methyl ester                                      |
| Palmitate__methyl_ester       | No | Lipid | Fatty acid, methyl ester                                      |
| _16_hydroxypalmitate          | No | Lipid | Fatty acid, monohydroxy                                       |
| _2_hydroxydecanoate           | No | Lipid | Fatty acid, monohydroxy                                       |
| _2_hydroxydecanoic_acid       | No | Lipid | Fatty acid, monohydroxy                                       |
| _2_hydroxymyristate           | No | Lipid | Fatty acid, monohydroxy                                       |
| _3_hydroxylaurate             | No | Lipid | Fatty acid, monohydroxy                                       |
| _3_hydroxymyristate           | No | Lipid | Fatty acid, monohydroxy                                       |
| _3_hydroxypalmitate           | No | Lipid | Fatty acid, monohydroxy                                       |
| _3_hydroxysebacate            | No | Lipid | Fatty acid, monohydroxy                                       |
| _5_hydroxyhexanoate           | No | Lipid | Fatty acid, monohydroxy                                       |
| _8_hydroxyoctanoate           | No | Lipid | Fatty acid, monohydroxy                                       |
| _9_hydroxystearate            | No | Lipid | Fatty acid, monohydroxy                                       |
| Alpha_hydroxycaproate         | No | Lipid | Fatty acid, monohydroxy                                       |
| _9_10_epoxystearate           | No | Lipid | Fatty acid, oxidized                                          |
| Choline_phosphate             | No | Lipid | Glycerolipid metabolism; phospholipid metabolism              |
| Glycerophosphoethanolamine    | No | Lipid | Glycerolipid metabolism; phospholipid metabolism              |
| _1_oleoylglycerophosphoglycer | No | Lipid | Glycerophosphodiester / lysolipid                             |
| _1_palmitoylglycerophosphogly | No | Lipid | Glycerophosphodiester / lysolipid                             |
| Scyllo_inositol               | No | Lipid | Inositol metabolism                                           |
| _4_hydroxy_2_nonenal          | No | Lipid | Lipid peroxidation; fatty acid, oxidized                      |
| Arachidate__20_0_             | No | Lipid | Long chain fatty acid                                         |
| Cis_vaccenate__18_1n7_        | No | Lipid | Long chain fatty acid                                         |
| Erucate__22_1n9_              | No | Lipid | Long chain fatty acid                                         |
| Mead_acid__20_3n9_            | No | Lipid | Long chain fatty acid; polyunsaturated fatty acid (n3 and n6) |
| _1_arachidonoyl_lpa           | No | Lipid | Lysolipid                                                     |
| _1_arachidonoylglycerophospha | No | Lipid | Lysolipid                                                     |
| _1_arachidoylglycerophosphoch | No | Lipid | Lysolipid                                                     |
| _1_docosahexaenoylglyceropeth | No | Lipid | Lysolipid                                                     |
| _1_docosahexaenoylglycerophos | No | Lipid | Lysolipid                                                     |
| _1_docosapentaenoylglyceropho | No | Lipid | Lysolipid                                                     |
| _1_eicosapentaenoylglyceropet | No | Lipid | Lysolipid                                                     |
| _1_eicosapentaenoylglyceropho | No | Lipid | Lysolipid                                                     |
| _1_eicosatrienoylglycerophosp | No | Lipid | Lysolipid                                                     |
| _1_eicosatrienoylglyceroppeth | No | Lipid | Lysolipid                                                     |
| _1_eicosenoylglycerophosphoch | No | Lipid | Lysolipid                                                     |
| _1_eicosenoylglycerophosphoet | No | Lipid | Lysolipid                                                     |
| _1_linolenoylglycerophosphoch | No | Lipid | Lysolipid                                                     |
| _1_linolenoylglycerophosphoet | No | Lipid | Lysolipid                                                     |

|                               |    |       |           |
|-------------------------------|----|-------|-----------|
| _1_myristoleoylglycerophospho | No | Lipid | Lysolipid |
| _1_myristoylglycerophosphocho | No | Lipid | Lysolipid |
| _1_nonadecanoylglycerophospho | No | Lipid | Lysolipid |
| _1_oleoylglycerophosphate     | No | Lipid | Lysolipid |
| _1_oleoylplasmenylethanolamin | No | Lipid | Lysolipid |
| _1_palmitoleoylglyceropea     | No | Lipid | Lysolipid |
| _1_palmitoleoylglyceropin     | No | Lipid | Lysolipid |
| _1_palmitoylglycerophosphate  | No | Lipid | Lysolipid |
| _1_pentadecanoylglycerophosph | No | Lipid | Lysolipid |
| _1_stearoylglycerophosphate   | No | Lipid | Lysolipid |
| _1_stearoylglycerophosphoglyc | No | Lipid | Lysolipid |
| _1_stearoylglycerophosphoseri | No | Lipid | Lysolipid |
| _1_stearoylplasmenylethanolam | No | Lipid | Lysolipid |
| _2_arachidonoylglycerophoscho | No | Lipid | Lysolipid |
| _2_arachidonoylglycerophoseth | No | Lipid | Lysolipid |
| _2_arachidonoylglycerophosino | No | Lipid | Lysolipid |
| _2_arachidoylglycerophosphoch | No | Lipid | Lysolipid |
| _2_docosahexaenoylglyceropc   | No | Lipid | Lysolipid |
| _2_docosahexaenoylglycerope   | No | Lipid | Lysolipid |
| _2_docosapentaenoylglycerope  | No | Lipid | Lysolipid |
| _2_eicosapentaenoylglycerope  | No | Lipid | Lysolipid |
| _2_eicosatrienoylglycerophosc | No | Lipid | Lysolipid |
| _2_linolenoylglycerophosphoch | No | Lipid | Lysolipid |
| _2_linoleoylglycerophosphocho | No | Lipid | Lysolipid |
| _2_linoleoylglycerophosphoeth | No | Lipid | Lysolipid |
| _2_myristoylglycerophosphocho | No | Lipid | Lysolipid |
| _2_oleoylglycerophosphocholin | No | Lipid | Lysolipid |
| _2_oleoylglycerophosphoethano | No | Lipid | Lysolipid |
| _2_oleoylglycerophosphoinosit | No | Lipid | Lysolipid |
| _2_palmitoleoylglycerophospho | No | Lipid | Lysolipid |
| _2_palmitoylglycerophosphoeth | No | Lipid | Lysolipid |
| _2_stearoylglycerophosphoinos | No | Lipid | Lysolipid |
| Palmitoyl_arachidonoyl_gppc_1 | No | Lipid | Lysolipid |
| Palmitoyl_arachidonoyl_gppc_2 | No | Lipid | Lysolipid |
| Palmitoyl_linoleoyl_gppc_1    | No | Lipid | Lysolipid |
| Palmitoyl_linoleoyl_gppc_2    | No | Lipid | Lysolipid |
| Palmitoyl_linoleoyl_gppi_1    | No | Lipid | Lysolipid |
| Palmitoyl_oleoyl_gppc_1       | No | Lipid | Lysolipid |
| Palmitoyl_oleoyl_gppg_2       | No | Lipid | Lysolipid |
| Palmitoyl_palmitoyl_gppc_1    | No | Lipid | Lysolipid |
| Palmitoyl_palmitoyl_gppc_2    | No | Lipid | Lysolipid |
| Stearoyl_arachidonoyl_gppc_1  | No | Lipid | Lysolipid |
| Stearoyl_arachidonoyl_gppc_2  | No | Lipid | Lysolipid |

|                               |    |       |                                                   |
|-------------------------------|----|-------|---------------------------------------------------|
| Stearoyl_arachidonoyl_gppe_1  | No | Lipid | Lysolipid                                         |
| Stearoyl_arachidonoyl_gppi_1  | No | Lipid | Lysolipid                                         |
| Stearoyl_linoleoyl_gppc_1     | No | Lipid | Lysolipid                                         |
| Stearoyl_linoleoyl_gppc_2     | No | Lipid | Lysolipid                                         |
| _2_aminooheptanoate           | No | Lipid | Medium chain fatty acid; fatty acid, amino        |
| _3_hydroxy_3_methylglutarate  | No | Lipid | Mevalonate metabolism                             |
| _1_dihomo_linolenylglycerol__ | No | Lipid | Monoacylglycerol                                  |
| _1_docosahexaenoylglycerol    | No | Lipid | Monoacylglycerol                                  |
| _1_linolenylglycerol          | No | Lipid | Monoacylglycerol                                  |
| _2_arachidonoyl_glycerol      | No | Lipid | Monoacylglycerol                                  |
| _2_docosahexaenoylglycerol    | No | Lipid | Monoacylglycerol                                  |
| _2_oleoylglycerol__2_monoolei | No | Lipid | Monoacylglycerol                                  |
| Chenodeoxycholate             | No | Lipid | Primary bile acid metabolism                      |
| Tauro_beta_muricholate        | No | Lipid | Primary bile acid metabolism                      |
| Pregnanolone_allopregnanolone | No | Lipid | Progestin steroids                                |
| _3b_hydroxy_5_cholenoic_acid  | No | Lipid | Secondary bile acid metabolism                    |
| _3beta_7alpha_dihydroxy_5_cho | No | Lipid | Secondary bile acid metabolism                    |
| _7_ketodeoxycholate           | No | Lipid | Secondary bile acid metabolism                    |
| Deoxycholate                  | No | Lipid | Secondary bile acid metabolism                    |
| Glycohyodeoxycholic_acid      | No | Lipid | Secondary bile acid metabolism                    |
| Glycolithocholate             | No | Lipid | Secondary bile acid metabolism                    |
| Taurolithocholate             | No | Lipid | Secondary bile acid metabolism                    |
| Ursodeoxycholate              | No | Lipid | Secondary bile acid metabolism                    |
| _3_methyladipate              | No | Lipid | Short chain fatty acid; fatty acid, dicarboxylate |
| Arachidoyl_sphingomyelin      | No | Lipid | Sphingolipid metabolism                           |
| Eicosenoyl_sphingomyelin      | No | Lipid | Sphingolipid metabolism                           |
| Erythro_sphingosine_1_phospha | No | Lipid | Sphingolipid metabolism                           |
| Euricoyl_sphingomyelin        | No | Lipid | Sphingolipid metabolism                           |
| Myristoleoyl_sphingomyelin    | No | Lipid | Sphingolipid metabolism                           |
| Myristoyl_sphingomyelin       | No | Lipid | Sphingolipid metabolism                           |
| Nervonoyl_sphingomyelin       | No | Lipid | Sphingolipid metabolism                           |
| Oleoyl_sphingomyelin          | No | Lipid | Sphingolipid metabolism                           |
| Palmitoleoyl_sphingomyelin    | No | Lipid | Sphingolipid metabolism                           |
| Sphingosine_1_phosphate       | No | Lipid | Sphingolipid metabolism                           |
| Sphingosyl_phosphocholine     | No | Lipid | Sphingolipid metabolism                           |
| _11_dehydrocorticosterone     | No | Lipid | Sterol/steroid                                    |
| _11_ketoetiocholanolone_glucu | No | Lipid | Sterol/steroid                                    |
| _16a_hydroxy_dhea_3_sulfate   | No | Lipid | Sterol/steroid                                    |
| _17alpha_hydroxypregnanolone  | No | Lipid | Sterol/steroid                                    |
| _21_hydroxypregnenolone_mono2 | No | Lipid | Sterol/steroid                                    |
| _21_hydroxypregnenolone_monos | No | Lipid | Sterol/steroid                                    |
| _4_androsten_3alpha_17adm_2   | No | Lipid | Sterol/steroid                                    |

|                               |    |                   |                                                                                      |
|-------------------------------|----|-------------------|--------------------------------------------------------------------------------------|
| _4_androsten_3alpha_17adm_3   | No | Lipid             | Sterol/steroid                                                                       |
| _4_androsten_3beta_17bdm_1    | No | Lipid             | Sterol/steroid                                                                       |
| _4_androsten_3beta_17bdm_2    | No | Lipid             | Sterol/steroid                                                                       |
| _5_pregnen_3b__17_d_20_o_3_s  | No | Lipid             | Sterol/steroid                                                                       |
| _5a_androstan_3a_17add        | No | Lipid             | Sterol/steroid                                                                       |
| _5a_androstan_3a_17adm        | No | Lipid             | Sterol/steroid                                                                       |
| _5a_androstan_3a_17bdm1       | No | Lipid             | Sterol/steroid                                                                       |
| _5a_androstan_3a_17bdm2       | No | Lipid             | Sterol/steroid                                                                       |
| _5a_androstan_3b_17bdm1       | No | Lipid             | Sterol/steroid                                                                       |
| _5a_androstan_3b_17bdm2       | No | Lipid             | Sterol/steroid                                                                       |
| _5alpha_pregnan_3alpha_20bdd1 | No | Lipid             | Sterol/steroid                                                                       |
| _5alpha_pregnan_3aorb_20bdd   | No | Lipid             | Sterol/steroid                                                                       |
| _5alpha_pregnan_3beta_20adm2  | No | Lipid             | Sterol/steroid                                                                       |
| _5alpha_pregnan_3beta_20bdm1  | No | Lipid             | Sterol/steroid                                                                       |
| _7_alpha_hydroxycholesterol   | No | Lipid             | Sterol/steroid                                                                       |
| _7_beta_hydroxycholesterol    | No | Lipid             | Sterol/steroid                                                                       |
| _7_dehydrocholesterol         | No | Lipid             | Sterol/steroid                                                                       |
| Beta_sitosterol               | No | Lipid             | Sterol/steroid                                                                       |
| Estrone_3_sulfate             | No | Lipid             | Sterol/steroid                                                                       |
| Etiocholanolone_glucuronide   | No | Lipid             | Sterol/steroid                                                                       |
| Testosterone                  | No | Lipid             | Sterol/steroid                                                                       |
| Testosterone_sulfate          | No | Lipid             | Sterol/steroid                                                                       |
| Ethylmalonate                 | No | Lipid; amino acid | Carnitine metabolism; valine, leucine and isoleucine metabolism                      |
| Methylphosphate               | No | Nucleotide        | Purine and pyrimidine metabolism                                                     |
| Xanthosine                    | No | Nucleotide        | Purine metabolism, (hypo)xanthine/inosine containing                                 |
| Adenosine_5__monophosphate__a | No | Nucleotide        | Purine metabolism, adenine containing                                                |
| Camp                          | No | Nucleotide        | Purine metabolism, adenine containing                                                |
| N6_succinyladenosine          | No | Nucleotide        | Purine metabolism, adenine containing                                                |
| Guanine                       | No | Nucleotide        | Purine metabolism, guanine containing                                                |
| N2_methylguanosine            | No | Nucleotide        | Purine metabolism, guanine containing                                                |
| N4_acetylcytidine             | No | Nucleotide        | Pyrimidine metabolism, cytidine containing                                           |
| Dihydroorotate                | No | Nucleotide        | Pyrimidine metabolism, orotate containing                                            |
| Orotate                       | No | Nucleotide        | Pyrimidine metabolism, orotate containing                                            |
| Orotidine                     | No | Nucleotide        | Pyrimidine metabolism, orotate containing                                            |
| _3_aminoisobutyrate           | No | Nucleotide        | Pyrimidine metabolism, thymine containing; valine, leucine and isoleucine metabolism |
| _2__deoxyuridine              | No | Nucleotide        | Pyrimidine metabolism, uracil containing                                             |
| Uracil                        | No | Nucleotide        | Pyrimidine metabolism, uracil                                                        |

|                        |    |         |            |
|------------------------|----|---------|------------|
|                        |    |         | containing |
| Alanylalanine          | No | Peptide | Dipeptide  |
| Alanylleucine          | No | Peptide | Dipeptide  |
| Alanylphenylalanine    | No | Peptide | Dipeptide  |
| Alpha_glutamyltyrosine | No | Peptide | Dipeptide  |
| Arginylisoleucine      | No | Peptide | Dipeptide  |
| Arginylleucine         | No | Peptide | Dipeptide  |
| Arginylphenylalanine   | No | Peptide | Dipeptide  |
| Asparagylleucine       | No | Peptide | Dipeptide  |
| Aspartylleucine        | No | Peptide | Dipeptide  |
| Aspartylphenylalanine  | No | Peptide | Dipeptide  |
| Cyclo_gly_pro_         | No | Peptide | Dipeptide  |
| Cyclo_l_phe_d_pro_     | No | Peptide | Dipeptide  |
| Cyclo_leu_pro_         | No | Peptide | Dipeptide  |
| Glutamine_isoleucine   | No | Peptide | Dipeptide  |
| Glycylglycine          | No | Peptide | Dipeptide  |
| Glycylisoleucine       | No | Peptide | Dipeptide  |
| Glycylphenylalanine    | No | Peptide | Dipeptide  |
| Glycylproline          | No | Peptide | Dipeptide  |
| Histidylalanine        | No | Peptide | Dipeptide  |
| Histidylisoleucine     | No | Peptide | Dipeptide  |
| Histidylleucine        | No | Peptide | Dipeptide  |
| Histidylphenylalanine  | No | Peptide | Dipeptide  |
| Histidyltryptophan     | No | Peptide | Dipeptide  |
| Histidylvaline         | No | Peptide | Dipeptide  |
| Isoleucylalanine       | No | Peptide | Dipeptide  |
| Isoleucylasparagine    | No | Peptide | Dipeptide  |
| Isoleucylaspartate     | No | Peptide | Dipeptide  |
| Isoleucylisoleucine    | No | Peptide | Dipeptide  |
| Isoleucylleucine       | No | Peptide | Dipeptide  |
| Isoleucylphenylalanine | No | Peptide | Dipeptide  |
| Isoleucylthreonine     | No | Peptide | Dipeptide  |
| Isoleucylvaline        | No | Peptide | Dipeptide  |
| Leucylalanine          | No | Peptide | Dipeptide  |
| Leucylarginine         | No | Peptide | Dipeptide  |
| Leucylasparagine       | No | Peptide | Dipeptide  |
| Leucylaspartate        | No | Peptide | Dipeptide  |
| Leucylglutamate        | No | Peptide | Dipeptide  |
| Leucylglutamine        | No | Peptide | Dipeptide  |
| Leucylleucine          | No | Peptide | Dipeptide  |
| Leucylphenylalanine    | No | Peptide | Dipeptide  |
| Leucylserine           | No | Peptide | Dipeptide  |
| Lysylmethionine        | No | Peptide | Dipeptide  |

|                         |    |         |           |
|-------------------------|----|---------|-----------|
| Lysylproline            | No | Peptide | Dipeptide |
| Lysylvaline             | No | Peptide | Dipeptide |
| Phenylalanylarginine    | No | Peptide | Dipeptide |
| Phenylanylglutamate     | No | Peptide | Dipeptide |
| Phenylanylleucine       | No | Peptide | Dipeptide |
| Phenylanylmethionine    | No | Peptide | Dipeptide |
| Phenylanylphenylalanine | No | Peptide | Dipeptide |
| Phenylanylproline       | No | Peptide | Dipeptide |
| Phenylanylserine        | No | Peptide | Dipeptide |
| Phenylanyltryptophan    | No | Peptide | Dipeptide |
| Phenylanylvaline        | No | Peptide | Dipeptide |
| Prolylalanine           | No | Peptide | Dipeptide |
| Prolylglycine           | No | Peptide | Dipeptide |
| Prolylphenylalanine     | No | Peptide | Dipeptide |
| Pyroglutamylglutamine   | No | Peptide | Dipeptide |
| Pyroglutamylglycine     | No | Peptide | Dipeptide |
| Pyroglutamylvaline      | No | Peptide | Dipeptide |
| Serylalanine            | No | Peptide | Dipeptide |
| Serylleucine            | No | Peptide | Dipeptide |
| Serylphenylalanine      | No | Peptide | Dipeptide |
| Seryltirosine           | No | Peptide | Dipeptide |
| Threonylisoleucine      | No | Peptide | Dipeptide |
| Threonylleucine         | No | Peptide | Dipeptide |
| Tryptophylasparagine    | No | Peptide | Dipeptide |
| Tryptophylaspartate     | No | Peptide | Dipeptide |
| Tryptophylglutamate     | No | Peptide | Dipeptide |
| Tryptophylglycine       | No | Peptide | Dipeptide |
| Tryptophylleucine       | No | Peptide | Dipeptide |
| Tryptophylmethionine    | No | Peptide | Dipeptide |
| Tryptophylphenylalanine | No | Peptide | Dipeptide |
| Tryptophyltryptophan    | No | Peptide | Dipeptide |
| Tyrosylalanine          | No | Peptide | Dipeptide |
| Tyrosylglutamate        | No | Peptide | Dipeptide |
| Tyrosylglutamine        | No | Peptide | Dipeptide |
| Tyrosylglycine          | No | Peptide | Dipeptide |
| Tyrosylisoleucine       | No | Peptide | Dipeptide |
| Tyrosylleucine          | No | Peptide | Dipeptide |
| Valylalanine            | No | Peptide | Dipeptide |
| Valylarginine           | No | Peptide | Dipeptide |
| Valylaspartate          | No | Peptide | Dipeptide |
| Valylglutamate          | No | Peptide | Dipeptide |
| Valylglutamine          | No | Peptide | Dipeptide |
| Valylglycine            | No | Peptide | Dipeptide |



|                               |    |             |                                |
|-------------------------------|----|-------------|--------------------------------|
| Valylhistidine                | No | Peptide     | Dipeptide                      |
| Valylisoleucine               | No | Peptide     | Dipeptide                      |
| Valylleucine                  | No | Peptide     | Dipeptide                      |
| Valylphenylalanine            | No | Peptide     | Dipeptide                      |
| Valylserine                   | No | Peptide     | Dipeptide                      |
| Valylvaline                   | No | Peptide     | Dipeptide                      |
| N_acetylcarnosine             | No | Peptide     | Dipeptide derivative           |
| Adpsgegdfxaeggvr              | No | Peptide     | Fibrinogen cleavage peptide    |
| Gamma_glutamyl_2_aminobutyrat | No | Peptide     | Gamma-glutamyl amino acid      |
| Gamma_glutamylglycine         | No | Peptide     | Gamma-glutamyl amino acid      |
| Gamma_glutamylhistidine       | No | Peptide     | Gamma-glutamyl amino acid      |
| Gamma_glutamyllysine          | No | Peptide     | Gamma-glutamyl amino acid      |
| Bradykinin                    | No | Peptide     | Polypeptide                    |
| Hxgxa                         | No | Peptide     | Polypeptide                    |
| _1_methyl_2_piperidinecarboxy | No | Unknown     |                                |
| _3_hydroxyindolin_2_one       | No | Unknown     |                                |
| Tartronate__hydroxymalonate_  | No | Xenobiotics | Bacterial/fungal               |
| _3_methoxycatechol_sulfate_1  | No | Xenobiotics | Benzoate metabolism            |
| _3_methoxycatechol_sulfate_2  | No | Xenobiotics | Benzoate metabolism            |
| Methyl_4_hydroxybenzoate      | No | Xenobiotics | Benzoate metabolism            |
| Methyl_4_hydroxybenzoate_sulf | No | Xenobiotics | Benzoate metabolism            |
| Propyl_4_hydroxybenzoate_sulf | No | Xenobiotics | Benzoate metabolism            |
| _3_methoxybenzenepropanoic_ac | No | Xenobiotics | Benzoate metabolism; bacterial |
| _3__2_hydroxyphenyl_propionat | No | Xenobiotics | Benzoate metabolism; chemical  |
| _1_2_3_benzenetriol_sulfate_2 | No | Xenobiotics | Chemical                       |
| _2_ethylhexanoate             | No | Xenobiotics | Chemical                       |
| _2_methoxyresorcinol_sulfate  | No | Xenobiotics | Chemical                       |
| _2_pyrrolidinone              | No | Xenobiotics | Chemical                       |
| _3_hydroxypyridine_sulfate    | No | Xenobiotics | Chemical                       |
| _4_hydroxychlorothalonil      | No | Xenobiotics | Chemical                       |
| _4_methylbenzenesulfonate     | No | Xenobiotics | Chemical                       |
| Dimethyl_sulfone              | No | Xenobiotics | Chemical                       |
| Ectoine                       | No | Xenobiotics | Chemical                       |
| Glycerol_2_phosphate          | No | Xenobiotics | Chemical                       |
| Heptaethylene_glycol          | No | Xenobiotics | Chemical                       |
| Hexaethylene_glycol           | No | Xenobiotics | Chemical                       |
| N_methylpipercolate           | No | Xenobiotics | Chemical                       |
| Nornicotine                   | No | Xenobiotics | Chemical                       |
| O_sulfo_l_tyrosine            | No | Xenobiotics | Chemical                       |
| Octaethylene_glycol           | No | Xenobiotics | Chemical                       |
| Pentaethylene_glycol          | No | Xenobiotics | Chemical                       |
| Phenylcarnitine               | No | Xenobiotics | Chemical                       |
| S__3_hydroxypropyl_mercapturi | No | Xenobiotics | Chemical                       |

|                               |    |             |                      |
|-------------------------------|----|-------------|----------------------|
| Sulfate                       | No | Xenobiotics | Chemical             |
| Tetraethylene_glycol          | No | Xenobiotics | Chemical             |
| Triethanolamine               | No | Xenobiotics | Chemical             |
| _1_hydroxy_2_naphthalenearbo  | No | Xenobiotics | Drug                 |
| _2_acetamidophenol_sulfate    | No | Xenobiotics | Drug                 |
| _2_hydroxyacetaminophen_sulfa | No | Xenobiotics | Drug                 |
| _2_hydroxyibuprofen           | No | Xenobiotics | Drug                 |
| _2_methoxyacetaminophen_glucu | No | Xenobiotics | Drug                 |
| _3__cystein_s_yl_acetaminophe | No | Xenobiotics | Drug                 |
| _3_n_acetyl_l_cystein_s_yl_   | No | Xenobiotics | Drug                 |
| _3_hydroxyquinine             | No | Xenobiotics | Drug                 |
| _4_acetamidophenol            | No | Xenobiotics | Drug                 |
| _4_acetamidophenylglucuronide | No | Xenobiotics | Drug                 |
| _4_acetaminophen_sulfate      | No | Xenobiotics | Drug                 |
| _4_hydroxycoumarin            | No | Xenobiotics | Drug                 |
| Carboxyibuprofen              | No | Xenobiotics | Drug                 |
| Cimetidine                    | No | Xenobiotics | Drug                 |
| Codeine                       | No | Xenobiotics | Drug                 |
| Desmethylnaproxen             | No | Xenobiotics | Drug                 |
| Desmethylnaproxen_sulfate     | No | Xenobiotics | Drug                 |
| Doxycycline                   | No | Xenobiotics | Drug                 |
| Gemfibrozil                   | No | Xenobiotics | Drug                 |
| Hydrochlorothiazide           | No | Xenobiotics | Drug                 |
| Hydroxyibuprofen              | No | Xenobiotics | Drug                 |
| Ibuprofen                     | No | Xenobiotics | Drug                 |
| Ibuprofen_acyl_glucuronide    | No | Xenobiotics | Drug                 |
| Metformin                     | No | Xenobiotics | Drug                 |
| Metoprolol                    | No | Xenobiotics | Drug                 |
| Naproxen                      | No | Xenobiotics | Drug                 |
| Nifedipine                    | No | Xenobiotics | Drug                 |
| Quinine                       | No | Xenobiotics | Drug                 |
| Ranitidine                    | No | Xenobiotics | Drug                 |
| Triamterene                   | No | Xenobiotics | Drug                 |
| Verapamil                     | No | Xenobiotics | Drug                 |
| _2_oxindole_3_acetate         | No | Xenobiotics | Food component/plant |
| _3_4_dimethoxycinnamic_acid   | No | Xenobiotics | Food component/plant |
| _3_5_dihydroxybenzoic_acid    | No | Xenobiotics | Food component/plant |
| _3_hydroxycinnamate_sulfate   | No | Xenobiotics | Food component/plant |
| _4_allylphenol_sulfate        | No | Xenobiotics | Food component/plant |
| _4_vinylguaiaicol_sulfate     | No | Xenobiotics | Food component/plant |
| Alliin                        | No | Xenobiotics | Food component/plant |
| Betonidine                    | No | Xenobiotics | Food component/plant |
| Eugenol_sulfate               | No | Xenobiotics | Food component/plant |

|                               |    |                        |                                                         |
|-------------------------------|----|------------------------|---------------------------------------------------------|
| Ferulic_acid_4_sulfate        | No | Xenobiotics            | Food component/plant                                    |
| Glycyrrhetinate               | No | Xenobiotics            | Food component/plant                                    |
| Indoleacrylate                | No | Xenobiotics            | Food component/plant                                    |
| Indolin_2_one                 | No | Xenobiotics            | Food component/plant                                    |
| Isoeugenol_sulfate            | No | Xenobiotics            | Food component/plant                                    |
| Methyl_glucoopyranoside__a_b_ | No | Xenobiotics            | Food component/plant                                    |
| N_acetylalliin                | No | Xenobiotics            | Food component/plant                                    |
| Phytanate                     | No | Xenobiotics            | Food component/plant                                    |
| Pyrraline                     | No | Xenobiotics            | Food component/plant                                    |
| S_allylcysteine               | No | Xenobiotics            | Food component/plant                                    |
| Sorbate                       | No | Xenobiotics            | Food component/plant                                    |
| Tartarate                     | No | Xenobiotics            | Food component/plant                                    |
| Theanine                      | No | Xenobiotics            | Food component/plant                                    |
| Umbelliferone_sulfate         | No | Xenobiotics            | Food component/plant                                    |
| _3_methylurate                | No | Xenobiotics            | Xanthine metabolism                                     |
| _7_methylurate                | No | Xenobiotics            | Xanthine metabolism                                     |
| Theobromine                   | No | Xenobiotics            | Xanthine metabolism                                     |
| Citraconate                   | No | Xenobiotics;<br>energy | Food component/plant; krebs cycle,<br>dicarboxylic acid |

**Web Table 2.** Pathway Analysis for Chemical Class of Metabolites for All-Cause Mortality in the ATBC Study (1985-2013). <sup>a</sup>

| <b>Chemical class</b>    | <b>No. of contributing metabolites</b> | <b><i>P</i> value</b> |
|--------------------------|----------------------------------------|-----------------------|
| Amino acids <sup>b</sup> | 99                                     | 0.0016                |
| Nucleotides              | 20                                     | 0.0025                |
| Lipids                   | 152                                    | 0.0047                |
| Carbohydrates            | 19                                     | 0.0053                |
| Xenobiotics              | 56                                     | 0.0073                |
| Peptides                 | 23                                     | 0.063                 |
| Energy                   | 7                                      | 0.11                  |
| Cofactors and Vitamins   | 19                                     | 0.24                  |

<sup>a</sup> We assessed the associations between chemical classes of metabolites and all-cause mortality using Fisher's method combining *P*-values. We tested a single *P* value for each pathway using parametric bootstrap. For each bootstrap replication, we re-calculated *P*-values from generated vector of score test statistics from multivariate normal distribution with mean 0 and estimated covariance matrix. Pathway *P* values are based on 100,000 permutations.

<sup>b</sup> Below the Bonferroni corrected threshold of  $P < 0.0021$  (8 tests and 3 outcomes).

**Web Table 3.** Pathway Analysis for Chemical Sub-Class of Metabolites for All-Cause Mortality in the ATBC Study (1985-2013). <sup>a</sup>

| <b>Chemical sub-class</b>                                                  | <b>No. of contributing metabolites</b> | <b>P value</b> |
|----------------------------------------------------------------------------|----------------------------------------|----------------|
| Primary bile acid metabolism <sup>b</sup>                                  | 5                                      | 0.00031        |
| Fructose, mannose, galactose, starch, and sucrose metabolism               | 3                                      | 0.00076        |
| Phenylalanine & tyrosine metabolism                                        | 16                                     | 0.0012         |
| Benzoate metabolism                                                        | 14                                     | 0.0018         |
| Tobacco metabolism                                                         | 4                                      | 0.0019         |
| Glycine, serine and threonine metabolism                                   | 8                                      | 0.0027         |
| Purine metabolism, guanine containing                                      | 4                                      | 0.0028         |
| Tryptophan metabolism                                                      | 12                                     | 0.0030         |
| Cysteine, methionine, sam, taurine metabolism                              | 8                                      | 0.0059         |
| Long chain fatty acid; polyunsaturated fatty acid (N3 and N6)              | 6                                      | 0.0063         |
| Valine, leucine and Isoleucine metabolism                                  | 19                                     | 0.012          |
| Long chain fatty acid                                                      | 12                                     | 0.015          |
| Purine metabolism, adenine containing                                      | 4                                      | 0.018          |
| Secondary bile acid metabolism                                             | 9                                      | 0.021          |
| Carnitine metabolism                                                       | 12                                     | 0.023          |
| Alanine and aspartate metabolism; pyrimidine metabolism, Uracil containing | 3                                      | 0.024          |
| Fatty acid metabolism (also bcaa metabolism)                               | 3                                      | 0.024          |
| Medium chain fatty acid                                                    | 8                                      | 0.029          |
| Sterol/steroid                                                             | 22                                     | 0.040          |
| Glycerolipid metabolism; phospholipid metabolism                           | 3                                      | 0.058          |
| Dipeptide                                                                  | 8                                      | 0.061          |
| Pentose metabolism                                                         | 9                                      | 0.066          |
| Lysine metabolism                                                          | 4                                      | 0.078          |
| Purine metabolism, (Hypo)xanthine/Inosine containing                       | 3                                      | 0.08           |
| Krebs cycle / TCA cycle                                                    | 6                                      | 0.081          |
| Fatty acid, dicarboxylate                                                  | 9                                      | 0.082          |
| Nicotinate and nicotinamide metabolism                                     | 3                                      | 0.11           |
| Urea cycle; arginine and proline metabolism                                | 10                                     | 0.11           |
| Pyrimidine metabolism, uracil containing                                   | 4                                      | 0.12           |
| Fatty acid, monohydroxy                                                    | 7                                      | 0.14           |
| Lysolipid                                                                  | 20                                     | 0.16           |
| Tocopherol metabolism                                                      | 5                                      | 0.18           |
| Xanthine metabolism                                                        | 14                                     | 0.18           |
| Essential fatty acid; polyunsaturated fatty acid (N3 and N6)               | 7                                      | 0.19           |
| Alanine and aspartate metabolism                                           | 4                                      | 0.21           |
| Food component/plant                                                       | 11                                     | 0.21           |

|                                                  |    |      |
|--------------------------------------------------|----|------|
| Inositol metabolism                              | 3  | 0.21 |
| Glycolysis, gluconeogenesis, pyruvate metabolism | 5  | 0.23 |
| Drug                                             | 8  | 0.28 |
| Hemoglobin and porphyrin metabolism              | 5  | 0.29 |
| Histidine metabolism                             | 6  | 0.30 |
| Glutamate metabolism                             | 3  | 0.35 |
| Gamma-glutamyl amino acid                        | 11 | 0.41 |
| Monoacylglycerol                                 | 10 | 0.42 |
| Sphingolipid metabolism                          | 4  | 0.62 |
| Ascorbate and aldarate metabolism                | 3  | 0.73 |

<sup>a</sup> We assessed the associations between chemical subclasses of metabolites and all-cause mortality using Fisher's method combining *P*-values. We tested a single *P* value for each pathway using parametric bootstrap. For each bootstrap replication, we re-calculated *P*-values from generated vector of score test statistics from multivariate normal distribution with mean 0 and estimated covariance matrix. Pathway *P* values are based on 100,000 permutations.

<sup>b</sup> Below the Bonferroni corrected threshold of  $P < 0.00036$  (46 tests and 3 outcomes).

**Web Table 4.** Pathway Analysis for Chemical Class of Metabolites for CVD Mortality in the ATBC Study (1985-2013).<sup>a</sup>

| <b>Chemical class</b>    | <b>No. of contributing metabolites</b> | <b><i>P</i> value</b> |
|--------------------------|----------------------------------------|-----------------------|
| Amino acids <sup>b</sup> | 99                                     | 0.0019                |
| Nucleotides              | 20                                     | 0.0056                |
| Lipids                   | 152                                    | 0.009                 |
| Carbohydrates            | 19                                     | 0.015                 |
| Peptides                 | 23                                     | 0.02                  |
| Energy                   | 7                                      | 0.044                 |
| Cofactors and Vitamins   | 19                                     | 0.063                 |
| Xenobiotics              | 56                                     | 0.15                  |

Abbreviations: CVD, cardiovascular disease

<sup>a</sup> We assessed the associations between chemical classes of metabolites and CVD mortality using Fisher's method combining *P*-values. We tested a single *P* value for each pathway using parametric bootstrap. For each bootstrap replication, we re-calculated *P*-values from generated vector of score test statistics from multivariate normal distribution with mean 0 and estimated covariance matrix. Pathway *P* values are based on 100,000 permutations.

<sup>b</sup> Below the Bonferroni corrected threshold of  $P < 0.0021$  (8 tests and 3 outcomes).

**Web Table 5.** Pathway Analysis for Chemical Sub-Class of Metabolites for CVD Mortality in the ATBC Study (1985-2013).<sup>a</sup>

| <b>Chemical sub-class</b>                                                  | <b>No. of contributing metabolites</b> | <b><i>P</i> value</b> |
|----------------------------------------------------------------------------|----------------------------------------|-----------------------|
| Primary bile acid metabolism <sup>b</sup>                                  | 5                                      | 0.00027               |
| Phenylalanine & tyrosine metabolism                                        | 16                                     | 0.00041               |
| Fructose, mannose, galactose, starch, and sucrose metabolism               | 3                                      | 0.0024                |
| Tryptophan metabolism                                                      | 12                                     | 0.0029                |
| Valine, leucine and Isoleucine metabolism                                  | 19                                     | 0.0047                |
| Purine metabolism, guanine containing                                      | 4                                      | 0.007                 |
| Glycine, serine and threonine metabolism                                   | 8                                      | 0.010                 |
| Sterol/steroid                                                             | 22                                     | 0.015                 |
| Secondary bile acid metabolism                                             | 9                                      | 0.017                 |
| Fatty acid metabolism (also bcaa metabolism)                               | 3                                      | 0.018                 |
| Cysteine, methionine, sam, taurine metabolism                              | 8                                      | 0.019                 |
| Tocopherol metabolism                                                      | 5                                      | 0.021                 |
| Krebs cycle / TCA cycle                                                    | 6                                      | 0.027                 |
| Dipeptide                                                                  | 8                                      | 0.037                 |
| Long chain fatty acid; polyunsaturated fatty acid (N3 and N6)              | 6                                      | 0.037                 |
| Lysolipid                                                                  | 20                                     | 0.041                 |
| Long chain fatty acid                                                      | 12                                     | 0.042                 |
| Purine metabolism, adenine containing                                      | 4                                      | 0.048                 |
| Tobacco metabolism                                                         | 4                                      | 0.052                 |
| Lysine metabolism                                                          | 4                                      | 0.053                 |
| Benzoate metabolism                                                        | 14                                     | 0.058                 |
| Carnitine metabolism                                                       | 12                                     | 0.066                 |
| Purine metabolism, (Hypo)xanthine/Inosine containing                       | 3                                      | 0.074                 |
| Fatty acid, dicarboxylate                                                  | 9                                      | 0.075                 |
| Pyrimidine metabolism, uracil containing                                   | 4                                      | 0.085                 |
| Medium chain fatty acid                                                    | 8                                      | 0.098                 |
| Alanine and aspartate metabolism; pyrimidine metabolism, Uracil containing | 3                                      | 0.11                  |
| Hemoglobin and porphyrin metabolism                                        | 5                                      | 0.11                  |
| Fatty acid, monohydroxy                                                    | 7                                      | 0.12                  |
| Essential fatty acid; polyunsaturated fatty acid (N3 and N6)               | 7                                      | 0.14                  |
| Glycerolipid metabolism; phospholipid metabolism                           | 3                                      | 0.15                  |
| Glycolysis, gluconeogenesis, pyruvate metabolism                           | 5                                      | 0.15                  |
| Inositol metabolism                                                        | 3                                      | 0.17                  |
| Alanine and aspartate metabolism                                           | 4                                      | 0.18                  |
| Urea cycle; arginine and proline metabolism                                | 10                                     | 0.19                  |
| Food component/plant                                                       | 11                                     | 0.21                  |
| Pentose metabolism                                                         | 9                                      | 0.23                  |



|                                        |    |      |
|----------------------------------------|----|------|
| Gamma-glutamyl amino acid              | 11 | 0.26 |
| Histidine metabolism                   | 6  | 0.28 |
| Ascorbate and aldarate metabolism      | 3  | 0.43 |
| Monoacylglycerol                       | 10 | 0.48 |
| Drug                                   | 8  | 0.53 |
| Xanthine metabolism                    | 14 | 0.65 |
| Nicotinate and nicotinamide metabolism | 3  | 0.72 |
| Glutamate metabolism                   | 3  | 0.77 |
| Sphingolipid metabolism                | 4  | 0.89 |

Abbreviations: CVD, cardiovascular disease

<sup>a</sup> We assessed the associations between chemical subclasses of metabolites and CVD mortality using Fisher's method combining *P*-values. We tested a single *P* value for each pathway using parametric bootstrap. For each bootstrap replication, we re-calculated *P*-values from generated vector of score test statistics from multivariate normal distribution with mean 0 and estimated covariance matrix. Pathway *P* values are based on 100,000 permutations.

<sup>b</sup> Below the Bonferroni corrected threshold of  $P < 0.00036$  (46 tests and 3 outcomes).

**Web Table 6.** Pathway Analysis for Chemical Class of Metabolites for Cancer Mortality in the ATBC Study (1985-2013).<sup>a</sup>

| <b>Chemical class</b>  | <b>No. of contributing metabolites</b> | <b><i>P</i> value</b> |
|------------------------|----------------------------------------|-----------------------|
| Xenobiotics            | 56                                     | 0.023                 |
| Amino acids            | 99                                     | 0.034                 |
| Nucleotides            | 20                                     | 0.051                 |
| Lipids                 | 152                                    | 0.13                  |
| Peptides               | 23                                     | 0.18                  |
| Carbohydrates          | 19                                     | 0.47                  |
| Cofactors and Vitamins | 19                                     | 0.77                  |
| Energy                 | 7                                      | 0.82                  |

<sup>a</sup> We assessed the associations between chemical classes of metabolites and cancer mortality using Fisher's method combining *P*-values. We tested a single *P* value for each pathway using parametric bootstrap. For each bootstrap replication, we re-calculated *P*-values from generated vector of score test statistics from multivariate normal distribution with mean 0 and estimated covariance matrix. Pathway *P* values are based on 100,000 permutations.

**Web Table 7.** Pathway Analysis for Chemical Sub-Class of Metabolites for Cancer Mortality in the ATBC Study (1985-2013).<sup>a</sup>

| <b>Chemical sub-class</b>                                                  | <b>No. of contributing metabolites</b> | <b>P value</b> |
|----------------------------------------------------------------------------|----------------------------------------|----------------|
| Tobacco metabolism                                                         | 4                                      | 0.0030         |
| Benzoate metabolism                                                        | 14                                     | 0.0036         |
| Phenylalanine & tyrosine metabolism                                        | 16                                     | 0.0078         |
| Tryptophan metabolism                                                      | 12                                     | 0.013          |
| Glycine, serine and threonine metabolism                                   | 8                                      | 0.030          |
| Purine metabolism, guanine containing                                      | 4                                      | 0.035          |
| Dipeptide                                                                  | 8                                      | 0.036          |
| Cysteine, methionine, sam, taurine metabolism                              | 8                                      | 0.039          |
| Food component/plant                                                       | 11                                     | 0.052          |
| Fructose, mannose, galactose, starch, and sucrose metabolism               | 3                                      | 0.069          |
| Valine, leucine and Isoleucine metabolism                                  | 19                                     | 0.089          |
| Secondary bile acid metabolism                                             | 9                                      | 0.092          |
| Purine metabolism, adenine containing                                      | 4                                      | 0.12           |
| Carnitine metabolism                                                       | 12                                     | 0.13           |
| Fatty acid metabolism (also BCAA metabolism)                               | 3                                      | 0.14           |
| Medium chain fatty acid                                                    | 8                                      | 0.14           |
| Glycerolipid metabolism; phospholipid metabolism                           | 3                                      | 0.16           |
| Long chain fatty acid                                                      | 12                                     | 0.16           |
| Sterol/steroid                                                             | 22                                     | 0.17           |
| Long chain fatty acid; polyunsaturated fatty acid (N3 and N6)              | 6                                      | 0.21           |
| Drug                                                                       | 8                                      | 0.22           |
| Fatty acid, dicarboxylate                                                  | 9                                      | 0.24           |
| Pyrimidine metabolism, uracil containing                                   | 4                                      | 0.26           |
| Fatty acid, monohydroxy                                                    | 7                                      | 0.27           |
| Nicotinate and nicotinamide metabolism                                     | 3                                      | 0.28           |
| Urea cycle; arginine and proline metabolism                                | 10                                     | 0.31           |
| Inositol metabolism                                                        | 3                                      | 0.32           |
| Histidine metabolism                                                       | 6                                      | 0.35           |
| Monoacylglycerol                                                           | 10                                     | 0.36           |
| Primary bile acid metabolism                                               | 5                                      | 0.38           |
| Hemoglobin and porphyrin metabolism                                        | 5                                      | 0.40           |
| Purine metabolism, (Hypo)xanthine/Inosine containing                       | 3                                      | 0.46           |
| Lysolipid                                                                  | 20                                     | 0.50           |
| Xanthine metabolism                                                        | 14                                     | 0.50           |
| Alanine and aspartate metabolism; pyrimidine metabolism, Uracil containing | 3                                      | 0.55           |
| Pentose metabolism                                                         | 9                                      | 0.67           |

|                                                              |    |      |
|--------------------------------------------------------------|----|------|
| Essential fatty acid; polyunsaturated fatty acid (N3 and N6) | 7  | 0.72 |
| Glutamate metabolism                                         | 3  | 0.73 |
| Alanine and aspartate metabolism                             | 4  | 0.73 |
| Tocopherol metabolism                                        | 5  | 0.74 |
| Krebs cycle / TCA cycle                                      | 6  | 0.76 |
| Gamma-glutamyl amino acid                                    | 11 | 0.79 |
| Ascorbate and aldarate metabolism                            | 3  | 0.81 |
| Sphingolipid metabolism                                      | 4  | 0.95 |
| Glycolysis, gluconeogenesis, pyruvate metabolism             | 5  | 0.95 |
| Lysine metabolism                                            | 4  | 0.96 |

<sup>a</sup> We assessed the associations between chemical subclasses of metabolites and cancer mortality using Fisher's method combining *P*-values. We tested a single *P* value for each pathway using parametric bootstrap. For each bootstrap replication, we re-calculated *P*-values from generated vector of score test statistics from multivariate normal distribution with mean 0 and estimated covariance matrix. Pathway *P* values are based on 100,000 permutations.

# Web Figure 2.





Web Figure 4.



Web Figure 5.





Web Figure 6.
